# Supplementary material for: Phosphorylated p-70S6K predicts tamoxifen resistance in postmenopausal breast cancer patients randomized between adjuvant tamoxifen versus no systemic treatment
Source: PubMed Central journal article supplement (PMC3979131; doi:10.1186/bcr3598), 2014-01-21

Table S1 Distribution of clinic-pathological variables between patients with sufficient tumor material for biomarker analysis and the total group of patients who entered the study

|                               |          | patients with sufficient tumor material | total study population |
|-------------------------------|----------|-----------------------------------------|------------------------|
|                               |          | N (%)                                   | N (%)                  |
|                               | total    | 739 (100)                               | 1662 (100)             |
| <b>age</b>                    | <65      | 378 (51)                                | 869 (52)               |
|                               | ≥ 65     | 361 (49)                                | 793 (48)               |
| <b>lymph node</b>             | negative | 393 (53)                                | 901 (54)               |
|                               | positive | 346 (47)                                | 761 (46)               |
| <b>T stage</b>                | T 1-2    | 659 (89)                                | 1482 (89)              |
|                               | T 3-4    | 80 (11)                                 | 180 (11)               |
| <b>ER status<sup>1</sup></b>  | positive | 468 (77)                                | 1014 (77)              |
|                               | negative | 142 (23)                                | 311 (23)               |
| <b>PgR status<sup>1</sup></b> | positive | 224 (57)                                | 513 (60)               |
|                               | negative | 168 (43)                                | 346 (40)               |

<sup>1</sup>As defined with ligand binding assay. After revision of recollected tumors, a total of 563 were ERα positive as assessed with immunohistochemistry

Table S2 Antibodies used for immunohistochemical assays

| Protein name             | Clone     | Company        | Art. No. | dilution |
|--------------------------|-----------|----------------|----------|----------|
| p-AKT (Ser473)           | D9E       | Cell signaling | 4060     | 1/50     |
| p-AKT (Thr308)           | C31E5E    | Cell signaling | 2965     | 1/50     |
| p-ERK1/2 (Thr202/Tyr204) | D13.14.4E | Cell signaling | 4370     | 1/400    |
| p-mTOR (Ser2448)         | 49F9      | Cell signaling | 2976     | 1/300    |
| p-p70S6K(Thr389)         | 1A5       | Cell signaling | 9206     | 1/300    |

**Table S3. Specifications of REMARK recommendations**

| <b>Introduction</b> |                                                                                                                                                                                                                                                                |
|---------------------|----------------------------------------------------------------------------------------------------------------------------------------------------------------------------------------------------------------------------------------------------------------|
| Marker              | Activated proteins downstream in PI3K and/or MAPK pathway (p-AKT(Ser473), p-AKT (Thr308), p-ERK1/2(Thr202/Tyr204), p-mTOR(Ser2448), p-p70S6K(Thr389).                                                                                                          |
| Objectives          | To evaluate the predictive capacity of activated proteins downstream in the PI3K and/or MAPK pathway with regard to adjuvant tamoxifen in postmenopausal breast cancer.                                                                                        |
| Hypothesis          | We hypothesize that activated proteins downstream in the PI3K and/or MAPK kinase pathways could potentially be used as a marker that separates patients who are likely to benefit from adjuvant tamoxifen treatment from those who are resistant to this drug. |

| <b>Methods (1)</b> | <b>Patients</b>                                                                                                                                                                                                                                                                                                                                                                                                                                                                                                                                                                                             |
|--------------------|-------------------------------------------------------------------------------------------------------------------------------------------------------------------------------------------------------------------------------------------------------------------------------------------------------------------------------------------------------------------------------------------------------------------------------------------------------------------------------------------------------------------------------------------------------------------------------------------------------------|
| Characteristics    | From 1982 until 1994 a randomized clinical trial was conducted in the Netherlands, studying the benefit of adjuvant tamoxifen (IKA-trial) in postmenopausal breast cancer patients.                                                                                                                                                                                                                                                                                                                                                                                                                         |
| Inclusion criteria | In the original study, 1662 breast cancer patients were included who were post-menopausal, less than 76 years of age and had a T <sub>1-4</sub> , N <sub>0-3</sub> , M <sub>0</sub> breast tumor. We have traced tissue blocks of participating patients and recollected sufficient tumor material of 739 patients, who did not differ in prognostic factors from the total group (Table S1). After revision of estrogen receptor $\alpha$ (ER $\alpha$ ) status as assessed with immunohistochemistry (IHC), a total of 563 ER $\alpha$ positive ( $\geq 10\%$ ) tumors were used for subsequent analysis. |
| Exclusion criteria | Mastitis or palpable supra- or infraclavicular lymph nodes                                                                                                                                                                                                                                                                                                                                                                                                                                                                                                                                                  |
| Treatment          | Patients were randomized in a 2:1 distribution between 1 year tamoxifen (30 mg per day) versus no adjuvant therapy. After 1 year a second randomization was performed to receive another 2 years of tamoxifen or to stop further treatment. From 1989, based on two interim analyses showing a significant improvement in recurrence free-free survival in lymph node positive patients, these node positive patients were all allocated to the tamoxifen treatment arm (ie skipped the first randomization).                                                                                               |

| <b>Methods (2)</b>   | <b>Specimen characteristics</b>                                                   |
|----------------------|-----------------------------------------------------------------------------------|
| Material used        | Formalin-fixed paraffin-embedded (FFPE) breast tumor tissue of the primary tumor. |
| Preservation/storage | Formalin fixation and paraffin embedding. Storage at room temperature.            |

| Methods (3)         | Assay methods                                                                                                                                                                                                                                                                                                                                                                                                                                    |
|---------------------|--------------------------------------------------------------------------------------------------------------------------------------------------------------------------------------------------------------------------------------------------------------------------------------------------------------------------------------------------------------------------------------------------------------------------------------------------|
| Assay               | Immunohistochemistry for phospho-proteins in the PI3K and or MAPK pathways was performed using monoclonal antibodies for phospho-AKT(Ser473) (Cell Signaling # 4060)(p-AKT(Ser473)), phospho- AKT(Thr308) (Cell Signaling # 2965)(p-AKT(Thr308)), phospho-mTOR(Ser2448) (Cell Signaling # 2976) (p-mTOR), phospho-p70S6K(Thr 389) (Cell Signalling # 9206)(p-p70S6K) and phospho-p44/42 MAPK(Thr202/Tyr204) (Cell Signaling # 4370) (p-ERK1/2) . |
| Protocol            | For p-AKT (Ser473), antigen retrieval was performed using citrate buffer and slides were incubated overnight with antibody (dilution 1:50). All other stainings were performed using a standardized protocol on the Ventana Benchmark® Ultra system. Staining protocols can be downloaded from our website: <a href="http://research.nki.nl/linnlab/index">http://research.nki.nl/linnlab/index</a>                                              |
| Control experiments | To ensure phospho-specificity of the antibodies, for each antibody a test TMA containing positive cores was dephosphorylated by $\lambda$ -phosphatase before staining, resulting in disappearance of the positive staining (Figure S1).                                                                                                                                                                                                         |
| Reproducibility     | For each immunohistochemical staining, one of the TMAs was quantified independently in a blinded manner by a second observer to calculate inter-observer variability. The inter-observer variability analyzed using the (weighted) Cohen's kappa coefficient is depicted in Table S4                                                                                                                                                             |
| Quantification      | Quantification of immunohistochemical staining was performed as described in the method section for immunohistochemistry.                                                                                                                                                                                                                                                                                                                        |
| Blinding            | Scoring of the immunohistochemical stainings was done without knowledge regarding both the recurrence-free-interval survival as well as the treatment arm at the time of scoring.                                                                                                                                                                                                                                                                |

| <b>Methods (4)</b>               | <b>Study design I</b>                                                                                                                                                                                                                                                                                                                                  |
|----------------------------------|--------------------------------------------------------------------------------------------------------------------------------------------------------------------------------------------------------------------------------------------------------------------------------------------------------------------------------------------------------|
| Case selection                   | A randomized controlled trial. The translational study presented here was performed retrospectively. The median duration of follow-up for patients without a recurrence event was 7.8 years. Patient records were re-evaluated for recurrence until 2000.                                                                                              |
| Clinical endpoints               | The improvement of recurrence free interval (RFI) with tamoxifen versus nil was assessed according to the different levels of the tested drivers and downstream activated proteins as specified below. RFI included local, regional, distant recurrences and breast cancer-specific death, but not contra-lateral breast cancer, as the primary event. |
| Variables examined or considered | Multivariate Cox models included age ( $\geq 65$ versus $< 65$ ), grade (grade 3 versus grade 1-2), tumor size (T3-4 versus T1-T2), HER2 status (positive versus negative) and progesterone status (positive versus negative) as covariates.                                                                                                           |
| Rational for sample size         | The sample size of the translational study is based on the amount of available tumor blocks containing invasive, ER $\alpha$ positive tumor cells, that could be recollected and a power calculation based on events in this group assuring that meaningful results could be deduced.                                                                  |

| <b>Methods (5)</b>                                   | <b>Statistical analysis</b>                                                                                                                                                                                                                                                                                                                                                                                                                                                                                                                                                                                                                                                                                                                                                                                                                                                                                                                                                                                                                                                                                                                                                                                                                                                                                                                                                                                                                     |
|------------------------------------------------------|-------------------------------------------------------------------------------------------------------------------------------------------------------------------------------------------------------------------------------------------------------------------------------------------------------------------------------------------------------------------------------------------------------------------------------------------------------------------------------------------------------------------------------------------------------------------------------------------------------------------------------------------------------------------------------------------------------------------------------------------------------------------------------------------------------------------------------------------------------------------------------------------------------------------------------------------------------------------------------------------------------------------------------------------------------------------------------------------------------------------------------------------------------------------------------------------------------------------------------------------------------------------------------------------------------------------------------------------------------------------------------------------------------------------------------------------------|
| Statistical methods and variable selection procedure | Recurrence free interval was defined as the time from the date of first randomization until the occurrence of a local, regional or distant recurrence or breast cancer specific death. A secondary contra-lateral breast tumor was not considered as an event as explained in the method section and these patients were censored at the date of this occurrence. All calculations were made with Statistical Package for the Social Sciences (SPSS) 15.0 Inc., IL, USA.                                                                                                                                                                                                                                                                                                                                                                                                                                                                                                                                                                                                                                                                                                                                                                                                                                                                                                                                                                        |
| Missing data                                         | Cases with a missing value for one of the variables were excluded from the multivariate analysis, with the exception of missing HER2 and PgR data for which a separate level was created                                                                                                                                                                                                                                                                                                                                                                                                                                                                                                                                                                                                                                                                                                                                                                                                                                                                                                                                                                                                                                                                                                                                                                                                                                                        |
| Marker handling in analysis                          | <p>Our primary analysis was to test whether tamoxifen benefit was dependent on any of the downstream activated proteins in the PI3K and/or /MAPK pathway. Markers were analyzed as binary factor, using the median level as cutoff. Adjusted Cox proportional hazard regression analyses were performed including an interaction variable. Covariates included age (<math>\geq 65</math> versus <math>&lt; 65</math>), grade (grade 3 versus grade 1-2), tumor size (T3-4 versus T1-T2), HER2 status (positive versus negative), and PgR status (positive versus negative). All survival analyses were stratified for nodal status. We applied a conservative level of significance (<math>p &lt; 0.01</math>) due to multiple co-primary endpoints.</p> <p>Further exploratory analyses examined tamoxifen benefit when the markers were implemented as continuous linear variables. In case an interaction was found, the level of dichotomization that best predicted tamoxifen benefit was tested by comparing the Akaike's Information Criterion (AIC) of the Cox proportional hazards models for all possible cutoffs. In addition, based on knowledge derived from preclinical studies a composed variable of either high p-ERK1/2 or high pmTOR, indicating the activation of either the MAPK or PI3K pathway, was tested for interaction with tamoxifen treatment. Survival curves were constructed using the Kaplan-Meier method.</p> |

| <b>Results (1)</b>                          |                                                                                                                                                                                                                    | <b>Data</b>                      |
|---------------------------------------------|--------------------------------------------------------------------------------------------------------------------------------------------------------------------------------------------------------------------|----------------------------------|
| Flow of patients                            | See Figure S2 for description of patients excluded for this translational study. See Table S1 for characteristics of total study patients versus the 739 patients with sufficient tumor material included in TMA . |                                  |
| Characteristics                             | See Table 1 and Table S5.                                                                                                                                                                                          |                                  |
| <b>Results (2)</b>                          |                                                                                                                                                                                                                    | <b>Analysis and presentation</b> |
| Relation to standard prognostic variables   | See Table 1.                                                                                                                                                                                                       |                                  |
| Univariate analysis                         | See Figures 2, 3, S5-7.                                                                                                                                                                                            |                                  |
| Multivariate analysis:                      | See Table 2 and Tables S7-10, S17-20. Estimated effects with CIs for marker and all other variables in the model.                                                                                                  |                                  |
| <b>Discussion</b>                           |                                                                                                                                                                                                                    |                                  |
| Interpretation, limitations and implication | See discussion section                                                                                                                                                                                             |                                  |

Table S4 Inter-observer variability for antibodies

| <b>antibody</b>      | <b>scoring system</b>                                    | <b>comparable<br/>cores from N<br/>patients</b> | <b>weighted<br/>Kappa<br/>(95% CI)</b> | <b>cutoff used for<br/>binary score</b> | <b>Kappa for<br/>binary score</b> |
|----------------------|----------------------------------------------------------|-------------------------------------------------|----------------------------------------|-----------------------------------------|-----------------------------------|
| <b>p-AKT(Ser473)</b> | cytoplasmic intensity                                    | 94                                              | 0.53<br>(0.42-0.64)                    | 2-3 versus 0                            | 0.70                              |
| <b>p-AKT(Thr308)</b> | cytoplasmic intensity                                    | 133                                             | 0.57<br>(0.44-0.68)                    | (1-3) versus 0                          | 0.53                              |
| <b>p-mTOR</b>        | proportion of tumor cells with<br>submembranous staining | 101                                             | 0.56<br>(0.44-0.66)                    | 0-59% versus<br>60% and more            | 0.60                              |
| <b>p-ERK1/2</b>      | proportion of tumor cells with<br>nuclear staining       | 69                                              | 0.74<br>(0.60-0.82)                    | negative versus<br>positive             | 0.85                              |
| <b>p-p70S6K</b>      | cytoplasmic intensity                                    | 97                                              | 0.42<br>(0.25-0.59)                    | (1-3) versus 0                          | 0.44                              |

Table S5: Association between p-AKT (Ser473), p-AKT (Thr308), p-mTOR, p-ERK1/2 and clinico-pathological variables

|                              |                        | p-AKT(Ser473)<br>(N=394) |                       |                     | p-AKT (Thr308)<br>(N=449) |                  |         | p-mTOR<br>(N=433)      |                         |                      | p-ERK1/2<br>(N=438) |                   |                     |
|------------------------------|------------------------|--------------------------|-----------------------|---------------------|---------------------------|------------------|---------|------------------------|-------------------------|----------------------|---------------------|-------------------|---------------------|
|                              |                        | low<br>(0-1)<br>N(%)     | high<br>(2-3)<br>N(%) | p-value             | negative<br>N(%)          | positive<br>N(%) | p-value | low<br>(0-59%)<br>N(%) | high<br>(≥ 60%)<br>N(%) | p-value              | negative<br>N (%)   | positive<br>N (%) | p-value             |
| <b>treatment</b>             | <b>no tamoxifen</b>    | 41 (24)                  | 46 (20)               | ns                  | 61 (24)                   | 40 (21)          | ns      | 69 (20)                | 26 (28)                 | ns                   | 50 (27)             | 45 (18)           | 0.04 <sup>(1)</sup> |
|                              | <b>tamoxifen 1 yr</b>  | 81 (48)                  | 103 (46)              |                     | 113 (44)                  | 95 (49)          |         | 162 (48)               | 41 (44)                 |                      | 82 (44)             | 122 (48)          |                     |
|                              | <b>tamoxifen 3 yrs</b> | 46 (27)                  | 77 (34)               |                     | 82 (32)                   | 58 (30)          |         | 109 (32)               | 26 (28)                 |                      | 53 (29)             | 86 (34)           |                     |
| <b>age</b>                   | <b>&lt;65</b>          | 79 (47)                  | 109 (48)              | ns                  | 117 (46)                  | 93 (48)          | ns      | 166 (49)               | 41 (44)                 | ns                   | 88 (48)             | 120 (47)          | ns                  |
|                              | <b>≥65</b>             | 89 (53)                  | 117 (52)              |                     | 139 (54)                  | 100 (52)         |         | 174 (51)               | 52 (56)                 |                      | 97 (52)             | 133 (53)          |                     |
| <b>histology</b>             | <b>ductal</b>          | 139 (82)                 | 168 (74)              | ns                  | 192 (75)                  | 144 (75)         | ns      | 263 (77)               | 61 (66)                 | ns                   | 149 (81)            | 181 (71)          | ns                  |
|                              | <b>lobular</b>         | 13 (8)                   | 16 (7)                |                     | 25 (10)                   | 14 (7)           |         | 28 (8)                 | 12 (13)                 |                      | 16 (9)              | 20 (8)            |                     |
|                              | <b>others</b>          | 16 (10)                  | 42 (18)               |                     | 39 (15)                   | 35 (18)          |         | 49 (14)                | 20(22)                  |                      | 20 (11)             | 52 (21)           |                     |
| <b>lymph node</b>            | <b>negative</b>        | 84 (50)                  | 125 (55)              | ns                  | 139 (54)                  | 103 (53)         | ns      | 174 (51)               | 54 (58)                 | ns                   | 97 (52)             | 136 (54)          | ns                  |
|                              | <b>positive</b>        | 84 (50)                  | 101 (45)              |                     | 117 (46)                  | 90 (47)          |         | 166 (49)               | 39 (42)                 |                      | 88 (48)             | 117 (46)          |                     |
| <b>T stage</b>               | <b>T1-2</b>            | 150 (89)                 | 201 (89)              | ns                  | 221 (86)                  | 175 (91)         | ns      | 300 (88)               | 83 (89)                 | ns                   | 160 (86)            | 229 (91)          | ns                  |
|                              | <b>T3-4</b>            | 18 (11)                  | 25 (11)               |                     | 35 (14)                   | 18 (9)           |         | 40 (12)                | 10 (11)                 |                      | 25 (14)             | 24 (9)            |                     |
| <b>grade</b>                 | <b>grade 1-2</b>       | 102 (61)                 | 138 (61)              | ns                  | 165 (64)                  | 124 (64)         | ns      | 203 (60)               | 68 (73)                 | 0.02 <sup>(2)</sup>  | 106 (57)            | 170 (67)          | 0.04 <sup>(2)</sup> |
|                              | <b>grade 3</b>         | 66 (39)                  | 88 (39)               |                     | 91 (36)                   | 69 (36)          |         | 137 (40)               | 25 (27)                 |                      | 79 (43)             | 83 (33)           |                     |
| <b>Progesterone receptor</b> | <b>negative</b>        | 92 (55)                  | 93 (41)               | 0.01 <sup>(2)</sup> | 130 (51)                  | 89 (46)          | ns      | 174 (51)               | 31 (33)                 | 0.002 <sup>(2)</sup> | 100 (54)            | 109 (43)          | 0.02 <sup>(2)</sup> |
|                              | <b>positive</b>        | 75 (45)                  | 131 (58)              |                     | 123 (48)                  | 104 (54)         |         | 164 (48)               | 62 (67)                 |                      | 83 (45)             | 143 (57)          |                     |
|                              | <b>missing</b>         | 1 (1)                    | 2 (1)                 |                     | 3 (1)                     | 0 (0)            |         | 2 (1)                  | 0 (0)                   |                      | 2 (1)               | 1 (0)             |                     |
| <b>HER2</b>                  | <b>negative</b>        | 149 (89)                 | 201 (89)              | ns                  | 229 (90)                  | 172 (89)         | ns      | 301 (89)               | 87 (94)                 | ns                   | 168 (91)            | 223 (88)          | ns                  |
|                              | <b>positive</b>        | 15 (9)                   | 20 (9)                |                     | 20 (8)                    | 17 (9)           |         | 32 (9)                 | 4 (4)                   |                      | 12 (6)              | 26 (10)           |                     |
|                              | <b>missing</b>         | 4 (2)                    | 5 (2)                 |                     | 7 (3)                     | 4 (2)            |         | 7 (2)                  | 2 (2)                   |                      | 5 (3)               | 4 (2)             |                     |

<sup>1</sup>Linear by linear test

<sup>2</sup>Fisher's exact test; analysis based on cases without missing values

Table S6 Overview of events in 563 ER positive patients

| <b>event</b>                                 | <b>total number (%)</b> | <b>first event (%)</b> |
|----------------------------------------------|-------------------------|------------------------|
| Loco (regional) recurrence                   | 25 (4)                  | 21(4)                  |
| Distant metastasis                           | 125(22)                 | 110(20)                |
| Secondary contra-lateral breast cancer       | 23 (4)                  | 21(4) <sup>1</sup>     |
| Breast cancer specific death                 | 87(15)                  | 1(0)                   |
| <sup>1</sup> <i>censored in RFI analysis</i> |                         |                        |



Table S7: Multivariate Cox proportional hazard model of recurrence free interval (RFI) including p-p70S6K and treatment interaction

| Variable                                    |          | Hazard Ratio <sup>1</sup> | 95% CI      | p-value |
|---------------------------------------------|----------|---------------------------|-------------|---------|
| <b>Age</b>                                  |          |                           |             |         |
| < 65                                        | 204 (54) | ref                       |             |         |
| ≥ 65                                        | 222 (47) | 0.93                      | 0.63-1.39   | 0.74    |
| <b>p T-stage</b>                            |          |                           |             |         |
| T1 or T2                                    | 377 (82) | ref                       |             |         |
| T3 or T4                                    | 49 (19)  | 1.67                      | 0.99 – 2.81 | 0.05    |
| <b>Histologic grade</b>                     |          |                           |             |         |
| I-II                                        | 269 (53) | ref                       |             |         |
| III                                         | 157 (48) | 1.26                      | 0.83-2.08   | 0.16    |
| <b>Progesterone receptor</b>                |          |                           |             |         |
| negative                                    | 205 (45) | ref                       |             |         |
| positive                                    | 221 (56) | 1.35                      | 0.88 – 1.90 | 0.28    |
| <b>HER2 status</b>                          |          |                           |             |         |
| negative                                    | 388 (89) | ref                       |             |         |
| positive                                    | 38 (12)  | 1.36                      | 0.71– 2.63  | 0.36    |
| <b>p-p70S6K</b>                             |          |                           |             |         |
| negative                                    | 179 (52) | ref                       |             |         |
| positive                                    | 247 (49) | 0.22                      | 0.10-0.53   | 0.001   |
| <b>Treatment</b>                            |          |                           |             |         |
| p-p70S6K negative and control               | 40 (17)  | ref                       |             |         |
| p-p70S6K negative and tamoxifen             | 139 (35) | 0.24                      | 0.13-0.47   | < 0.001 |
| p-p70S6K positive and control               | 54 (8)   | ref                       |             |         |
| p-p70S6K positive and tamoxifen             | 193 (41) | 1.02                      | 0.48-2.21   | 0.95    |
| interaction phospho-S6K X treatment         |          |                           |             | 0.004   |
| <sup>1</sup> stratified for nodal status    |          |                           |             |         |
| Analysis based on 426 cases with 101 events |          |                           |             |         |

Table S8: Adjusted p value for the interactions between tamoxifen treatment and downstream activated proteins in the PI3K and/or MAPK pathways analyzed as continuous variable. Covariates included age, T-stage, grade, PgR status and HER2 status. Models are stratified for nodal status

| <b>adjusted interaction tests for markers of PI3K pathway</b> |                        |                                                        |
|---------------------------------------------------------------|------------------------|--------------------------------------------------------|
|                                                               | <b>variable levels</b> | <b>Adjusted p-value for interaction with tamoxifen</b> |
| <b>p-AKT(Ser473)</b>                                          | <b>0-3</b>             | 0.17                                                   |
| <b>p-AKT(Thr308)</b>                                          | <b>0-3</b>             | 0.03                                                   |
| <b>p-mTOR</b>                                                 | <b>0-100</b>           | 0.03                                                   |
| <b>p-ERK1/2</b>                                               | <b>0-100</b>           | 0.14                                                   |
| <b>p-p70S6K</b>                                               | <b>0-3</b>             | <b>0.006</b>                                           |

Table S9: Multivariate Cox proportional hazard model of recurrence free interval (RFI) including p-mTOR and treatment interaction

| Variable                                    | N(events) | Hazard Ratio <sup>1</sup> | 95% CI      | p-value |
|---------------------------------------------|-----------|---------------------------|-------------|---------|
| <b>Age</b>                                  |           |                           |             |         |
| < 65                                        | 202 (55)  | ref                       |             |         |
| ≥ 65                                        | 219 (48)  | 0.90                      | 0.60-1.32   | 0.58    |
| <b>p T-stage</b>                            |           |                           |             |         |
| T1 or T2                                    | 372 (82)  | ref                       |             |         |
| T3 or T4                                    | 49 (21)   | 1.72                      | 1.05 – 2.84 | 0.03    |
| <b>Histologic grade</b>                     |           |                           |             |         |
| I-II                                        | 264 (54)  | ref                       |             |         |
| III                                         | 157 (49)  | 1.34                      | 0.88 -2.06  | 0.18    |
| <b>Progesterone receptor</b>                |           |                           |             |         |
| negative                                    | 202 (45)  | ref                       |             |         |
| positive                                    | 219 (58)  | 1.31                      | 0.86 – 1.99 | 0.20    |
| <b>HER2 status</b>                          |           |                           |             |         |
| negative                                    | 385 (91)  | ref                       |             |         |
| positive                                    | 36 (12)   | 1.45                      | 0.75 -2.78  | 0.27    |
| <b>p-mTOR</b>                               |           |                           |             |         |
| low (0-59%)                                 | 330 (86)  | ref                       |             |         |
| high(60% and more)                          | 91 (17)   | 0.19                      | 0.05-0.82   | 0.03    |
| <b>Treatment</b>                            |           |                           |             |         |
| low p-mTOR and control                      | 67 (24)   | ref                       |             |         |
| low p-mTOR and tamoxifen                    | 263 (62)  | 0.39                      | 0.23-0.64   | 0.0002  |
| high p-mTOR and control                     | 26 (2)    | ref                       |             |         |
| high p-mTOR and tamoxifen                   | 65 (15)   | 2.03                      | 0.46-9.04   | 0.35    |
| interaction p-mTOR X treatment              |           |                           |             | 0.04    |
| <sup>1</sup> stratified for nodal status    |           |                           |             |         |
| Analysis based on 421 cases with 103 events |           |                           |             |         |

Table S10: Multivariate Cox proportional hazard model of recurrence free interval (RFI) including p-AKT(Thr308) and treatment interaction.

| Variable                                    | N (events) | Hazard Ratio <sup>1</sup> | 95% CI      | p-value |
|---------------------------------------------|------------|---------------------------|-------------|---------|
| <b>Age</b>                                  |            |                           |             |         |
| < 65                                        | 204 (53)   | ref                       |             |         |
| ≥ 65                                        | 230 (50)   | 0.88                      | 0.60-1.31   | 0.54    |
| <b>p T-stage</b>                            |            |                           |             |         |
| T1 or T2                                    | 383 (83)   | ref                       |             |         |
| T3 or T4                                    | 51 (20)    | 1.46                      | 0.88 – 2.43 | 0.15    |
| <b>Histologic grade</b>                     |            |                           |             |         |
| I-II                                        | 280 (54)   | ref                       |             |         |
| III                                         | 154 (49)   | 1.53                      | 1.01-2.32   | 0.05    |
| <b>Progesterone receptor</b>                |            |                           |             |         |
| negative                                    | 215 (46)   | ref                       |             |         |
| positive                                    | 219 (57)   | 1.26                      | 0.84-1.89   | 0.27    |
| <b>HER2 status</b>                          |            |                           |             |         |
| negative                                    | 397 (91)   | ref                       |             |         |
| positive                                    | 37 (12)    | 1.31                      | 0.68– 2.52  | 0.42    |
| <b>p-AKT (Thr308)</b>                       |            |                           |             |         |
| negative                                    | 246 (67)   | ref                       |             |         |
| positive                                    | 188 (36)   | 0.34                      | 0.13-0.84   | 0.02    |
| <b>Treatment</b>                            |            |                           |             |         |
| p-AKT (Thr308) negative                     | 61 (20)    | ref                       |             |         |
| p-AKT (Thr308) negative                     | 185 (47)   | 0.42                      | 0.24-0.74   | 0.003   |
| p-AKT(Thr308) positive and                  | 39 (6)     | ref                       |             |         |
| p-AKT(Thr308) positive and                  | 149 (30)   | 1.03                      | 0.43-2.50   | 0.94    |
| Interaction p-AKT(Thr308)X<br>treatment     |            |                           |             | 0.09    |
| <sup>1</sup> stratified for nodal status    |            |                           |             |         |
| Analysis based on 434 cases with 103 events |            |                           |             |         |

Table S11: Multivariate Cox proportional hazard model of recurrence free interval (RFI) including p-ERK 1/2 and treatment interaction.

| Variable                                    | N (events) | Hazard Ratio <sup>1</sup> | 95% CI      | p-value |
|---------------------------------------------|------------|---------------------------|-------------|---------|
| <b>Age</b>                                  |            |                           |             |         |
| < 65                                        | 201 (52)   | ref                       |             |         |
| ≥ 65                                        | 224 (50)   | 0.93                      | 0.62-1.38   | 0.74    |
| <b>p T-stage</b>                            |            |                           |             |         |
| T1 or T2                                    | 377 (83)   | ref                       |             |         |
| T3 or T4                                    | 48 (19)    | 1.62                      | 0.96 – 2.72 | 0.07    |
| <b>Histologic grade</b>                     |            |                           |             |         |
| I-II                                        | 268 (54)   | ref                       |             |         |
| III                                         | 157 (48)   | 1.34                      | 0.88-2.05   | 0.18    |
| <b>Progesterone receptor</b>                |            |                           |             |         |
| negative                                    | 206 (44)   | ref                       |             |         |
| positive                                    | 219 (58)   | 1.32                      | 0.87 – 2.00 | 0.19    |
| <b>HER2 status</b>                          |            |                           |             |         |
| negative                                    | 387 (90)   | ref                       |             |         |
| positive                                    | 38 (12)    | 1.33                      | 0.69- 2.57  | 0.39    |
| <b>p-ERK1/2</b>                             |            |                           |             |         |
| negative                                    | 178 (46)   | ref                       |             |         |
| positive                                    | 247 (56)   | 0.46                      | 0.20-1.08   | 0.07    |
| <b>Treatment</b>                            |            |                           |             |         |
| p-ERK1/2 negative and control               | 49 (18)    | ref                       |             |         |
| p-ERK1/2 negative and tamoxifen             | 129 (28)   | 0.34                      | 0.18-0.63   | 0.001   |
| p-ERK1/2 positive and control               | 45 (8)     | ref                       |             |         |
| p-ERK1/2 positive and tamoxifen             | 202 (48)   | 0.87                      | 0.40-1.86   | 0.72    |
| Interaction p-ERK1/2 X treatment            |            |                           |             | 0.06    |
| <sup>1</sup> stratified for nodal status    |            |                           |             |         |
| Analysis based on 425 cases with 102 events |            |                           |             |         |

Table S12 Patient characteristics by treatment arm and p-mTOR status

|                              |          | p-mTOR        |           |                      |               |           |                      |
|------------------------------|----------|---------------|-----------|----------------------|---------------|-----------|----------------------|
|                              |          | low (0-59%)   |           |                      | high (≥60%)   |           |                      |
|                              |          | treatment arm |           | p value <sup>1</sup> | treatment arm |           | p-value <sup>1</sup> |
|                              |          | control       | tamoxifen |                      | control       | tamoxifen |                      |
|                              |          | N (%)         | N (%)     |                      | N (%)         | N (%)     |                      |
|                              |          | 69 (100)      | 271 (100) |                      | 26 (100)      | 67 (100)  |                      |
| <b>age</b>                   | <65      | 38 (55)       | 128 (47)  | 0.28                 | 12 (46)       | 29 (43)   | 0.82                 |
|                              | ≥ 65     | 31 (45)       | 143 (53)  |                      | 14 (54)       | 38 (57)   |                      |
| <b>histology</b>             | ductal   | 54 (78)       | 209 (77)  | 0.16                 | 16 (62)       | 45 (83)   | 1.00                 |
|                              | lobulars | 9 (13)        | 19 (7)    |                      | 3 (12)        | 9 (17)    |                      |
|                              | others   | 6 (9)         | 43 (16)   |                      | 7 (26)        | 13 (19)   |                      |
| <b>lymph node</b>            | negative | 52 (75)       | 122 (45)  | <0.001               | 22 (85)       | 32 (48)   | 0.001                |
|                              | positive | 17 (25)       | 149 (55)  |                      | 4 (15)        | 35 (52)   |                      |
| <b>T stage</b>               | T 1-2    | 61 (88)       | 239 (88)  | 1.00                 | 24 (92)       | 59 (88)   | 0.72                 |
|                              | T 3-4    | 8 (12)        | 32 (12)   |                      | 2 (8)         | 8 (12)    |                      |
| <b>grade</b>                 | I-II     | 40 (58)       | 163 (60)  | 0.78                 | 18 (69)       | 50 (75)   | 0.61                 |
|                              | III      | 29 (42)       | 108 (40)  |                      | 8 (31)        | 17 (25)   |                      |
| <b>progesterone receptor</b> | negative | 37 (54)       | 137 (51)  | 0.79                 | 10 (38)       | 21 (31)   | 0.63                 |
|                              | positive | 32 (46)       | 132 (49)  |                      | 16 (62)       | 46 (69)   |                      |
|                              | missing  | 0 (0)         | 2 (1)     |                      | 0 (0)         | 0 (0)     |                      |
| <b>HER2 status</b>           | negative | 65 (94)       | 236 (87)  | 0.04                 | 25 (96)       | 62 (93)   | 1.00                 |
|                              | positive | 2 (3)         | 30 (11)   |                      | 1 (4)         | 3 (4)     |                      |
|                              | missing  | 2 (3)         | 5(2)      |                      | 0 (0)         | 2 (3)     |                      |

<sup>1</sup>Fisher's exact test

Table S13 Patient characteristics by treatment arm and p-p70S6K status

|                              |          | p-p70S6K      |           |                      |               |           |                      |
|------------------------------|----------|---------------|-----------|----------------------|---------------|-----------|----------------------|
|                              |          | negative      |           |                      | positive      |           |                      |
|                              |          | treatment arm |           | p value <sup>1</sup> | treatment arm |           | p-value <sup>1</sup> |
|                              |          | control       | tamoxifen |                      | control       | tamoxifen |                      |
|                              |          | N (%)         | N (%)     |                      | N (%)         | N (%)     |                      |
|                              |          | 40 (100)      | 148 (100) |                      | 55 (100)      | 195 (100) |                      |
| <b>age</b>                   | <65      | 25 (63)       | 57 (39)   | 0.007                | 27 (49)       | 101 (52)  | 0.76                 |
|                              | ≥ 65     | 15 (38)       | 91 (61)   |                      | 28 (51)       | 94 (48)   |                      |
| <b>histology</b>             | ductal   | 31 (78)       | 113 (76)  | 0.40                 | 40 (73)       | 147 (75)  | 0.36                 |
|                              | lobulars | 6 (15)        | 14 (9)    |                      | 5 (9)         | 11 (6)    |                      |
|                              | others   | 3 (8)         | 21 (14)   |                      | 10 (18)       | 37 (19)   |                      |
| <b>lymph node</b>            | negative | 34 (85)       | 58 (39)   | <0.001               | 41 (75)       | 100 (51)  | 0.002                |
|                              | positive | 6 (15)        | 90 (61)   |                      | 14 (25)       | 95 (49)   |                      |
| <b>T stage</b>               | T 1-2    | 37 (93)       | 130 (88)  | 0.57                 | 50 (91)       | 171 (88)  | 0.54                 |
|                              | T 3-4    | 3 (8)         | 18 (12)   |                      | 5 (9)         | 24 (12)   |                      |
| <b>grade</b>                 | I-II     | 23 (58)       | 100 (68)  | 0.26                 | 35 (64)       | 118 (61)  | 0.76                 |
|                              | III      | 17 (43)       | 48 (32)   |                      | 20 (36)       | 77 (39)   |                      |
| <b>progesterone receptor</b> | negative | 24 (60)       | 74 (50)   | 0.37                 | 22 (40)       | 89 (46)   | 0.54                 |
|                              | positive | 16 (40)       | 72 (49)   |                      | 33 (60)       | 106 (54)  |                      |
|                              | missing  | 0 (0)         | 2 (1)     |                      | 0 (0)         | 0 (0)     |                      |
| <b>HER2 status</b>           | negative | 39 (98)       | 129 (87)  | 0.31                 | 51 (93)       | 172 (88)  | 0.22                 |
|                              | positive | 1 (3)         | 11 (7)    |                      | 3 (5)         | 23 (12)   |                      |
|                              | missing  | 0 (0)         | 8(5)      |                      | 1 (2)         | 0 (0)     |                      |

<sup>1</sup>Fisher's exact test

Table S14 Patient characteristics by treatment arm and p-ERK1/2 status

|                              |          | p-ERK1/2      |           |                      |               |           |                      |
|------------------------------|----------|---------------|-----------|----------------------|---------------|-----------|----------------------|
|                              |          | negative      |           |                      | positive      |           |                      |
|                              |          | treatment arm |           | p value <sup>1</sup> | treatment arm |           | p-value <sup>1</sup> |
|                              |          | control       | tamoxifen |                      | control       | tamoxifen |                      |
|                              |          | N (%)         | N (%)     |                      | N (%)         | N (%)     |                      |
|                              |          | 50 (100)      | 135 (100) |                      | 45 (100)      | 208 (100) |                      |
| <b>age</b>                   | <65      | 27 (54)       | 61 (45)   | 0.32                 | 24 (53)       | 96 (46)   | 0.41                 |
|                              | ≥ 65     | 23 (46)       | 74 (55)   |                      | 21 (47)       | 112 (54)  |                      |
| <b>histology</b>             | ductal   | 41 (82)       | 108 (80)  | 0.40                 | 29 (64)       | 152 (73)  | 0.13                 |
|                              | lobulars | 6 (12)        | 10 (7)    |                      | 6 (13)        | 14 (7)    |                      |
|                              | others   | 3 (6)         | 17 (13)   |                      | 10(22)        | 42(20)    |                      |
| <b>lymph node</b>            | negative | 39 (78)       | 58 (43)   | <0.001               | 35 (78)       | 101 (49)  | <0.001               |
|                              | positive | 11 (22)       | 77 (57)   |                      | 10 (22)       | 107 (51)  |                      |
| <b>T stage</b>               | T 1-2    | 43 (86)       | 117 (87)  | 1.00                 | 42 (93)       | 187 (90)  | 0.59                 |
|                              | T 3-4    | 7 (14)        | 18 (13)   |                      | 3 (7)         | 21 (10)   |                      |
| <b>grade</b>                 | I-II     | 25 (50)       | 81 (60)   | 0.24                 | 33 (73)       | 137 (66)  | 0.38                 |
|                              | III      | 25 (50)       | 54 (40)   |                      | 12 (27)       | 71 (34)   |                      |
| <b>progesterone receptor</b> | negative | 29 (58)       | 71 (53)   | 0.62                 | 18 (40)       | 91 (44)   | 0.74                 |
|                              | positive | 21 (42)       | 62 (46)   |                      | 27 (60)       | 116 (56)  |                      |
|                              | missing  | 0 (0)         | 2 (1)     |                      | 0 (0)         | 1 (0)     |                      |
| <b>HER2 status</b>           | negative | 48 (96)       | 120 (89)  | 0.18                 | 43 (96)       | 180 (87)  | 0.18                 |
|                              | positive | 1 (2)         | 11 (8)    |                      | 2 (4)         | 24 (12)   |                      |
|                              | missing  | 1(2)          | 4 (3)     |                      | 0 (0)         | 4(1)      |                      |

<sup>1</sup>Fisher's exact test



Table S15 Patient characteristics by treatment arm and p-AKT (Thr308) status

|                              |          | p-AKT (Thr308) |           |                      |               |           |                      |
|------------------------------|----------|----------------|-----------|----------------------|---------------|-----------|----------------------|
|                              |          | negative       |           |                      | positive      |           |                      |
|                              |          | treatment arm  |           | p value <sup>1</sup> | treatment arm |           | p-value <sup>1</sup> |
|                              |          | control        | tamoxifen |                      | control       | tamoxifen |                      |
|                              |          | N (%)          | N (%)     |                      | N (%)         | N (%)     |                      |
|                              |          | 61 (100)       | 195 (100) |                      | 40 (100)      | 153 (100) |                      |
| <b>age</b>                   | <65      | 31 (51)        | 86 (44)   | 0.38                 | 21 (53)       | 72 (47)   | 0.60                 |
|                              | ≥ 65     | 30 (49)        | 109 (56)  |                      | 19 (48)       | 81 (53)   |                      |
| <b>histology</b>             | ductal   | 46 (75)        | 146 (75)  | 1.00                 | 28 (70)       | 116 (76)  | 0.17                 |
|                              | lobulars | 6 (10)         | 19 (10)   |                      | 5 (13)        | 9 (6)     |                      |
|                              | others   | 9 (15)         | 30 (15)   |                      | 7 (18)        | 28 (18)   |                      |
| <b>lymph node</b>            | negative | 51 (84)        | 88 (45)   | <0.001               | 28 (70)       | 75 (49)   | 0.02                 |
|                              | positive | 10 (16)        | 107 (55)  |                      | 12 (30)       | 78 (51)   |                      |
| <b>T stage</b>               | T 1-2    | 52 (85)        | 169 (87)  | 0.83                 | 38 (95)       | 137 (90)  | 0.37                 |
|                              | T 3-4    | 9 (15)         | 26 (13)   |                      | 2 (5)         | 16 (10)   |                      |
| <b>grade</b>                 | I-II     | 34 (56)        | 131 (67)  | 0.13                 | 30 (75)       | 94 (61)   | 0.14                 |
|                              | III      | 27 (44)        | 64 (33)   |                      | 10 (25)       | 59 (39)   |                      |
| <b>progesterone receptor</b> |          | 34 (56)        | 96 (49)   | 0.47                 | 18 (45)       | 71 (47)   | 1.00                 |
|                              | negative |                |           |                      |               |           |                      |
|                              | positive | 27 (44)        | 96 (49)   |                      | 22 (55)       | 82 (54)   |                      |
|                              | missing  | 0(0)           | 3 (2)     |                      | 0 (0)         | 0 (0)     |                      |
| <b>HER2 status</b>           | negative | 59 (97)        | 170 (87)  | 0.17                 | 38 (95)       | 134 (88)  | 0.20                 |
|                              | positive | 2 (3)          | 18 (9)    |                      | 1 (3)         | 16 (10)   |                      |
|                              | missing  | 0 (0)          | 7 (4)     |                      | 1 (3)         | 3 (2)     |                      |

<sup>1</sup>Fisher's exact test

Table S16. Multivariate Cox proportional hazard model of recurrence free interval (RFI) including p-mTOR or p-ERK1/2 and treatment interaction.

| Variable                                       | N(events) | Hazard Ratio <sup>1</sup> | 95% CI      | p-value |
|------------------------------------------------|-----------|---------------------------|-------------|---------|
| <b>Age</b>                                     |           |                           |             |         |
| < 65                                           | 201 (52)  | ref                       |             |         |
| ≥ 65                                           | 224 (50)  | 0.93                      | 0.63-1.39   | 0.74    |
| <b>p T-stage</b>                               |           |                           |             |         |
| T1 or T2                                       | 377 (83)  | ref                       |             |         |
| T3 or T4                                       | 48 (19)   | 1.70                      | 1.01 – 2.85 | 0.05    |
| <b>Histologic grade</b>                        |           |                           |             |         |
| I-II                                           | 268 (54)  | ref                       |             |         |
| III                                            | 157 (48)  | 1.32                      | 0.87 -2.03  | 0.20    |
| <b>Progesterone receptor</b>                   |           |                           |             |         |
| negative                                       | 206 (44)  | ref                       |             |         |
| positive                                       | 219 (58)  | 1.34                      | 0.88 – 2.03 | 0.17    |
| <b>HER2 status</b>                             |           |                           |             |         |
| negative                                       | 387 (90)  | ref                       |             |         |
| positive                                       | 38 (12)   | 1.32                      | 0.69 -2.56  | 0.40    |
| <b>p-mTOR and/or p-ERK1/2</b>                  |           |                           |             |         |
| p-mTOR low (0-59%) and pERK1/2 negative        | 157 (41)  | ref                       |             |         |
| p-mTOR high(60% and more) or pERK1/2 positive  | 268 (61)  | 0.34                      | 0.15-0.77   | 0.01    |
| <b>Treatment</b>                               |           |                           |             |         |
| (low p-mTOR and pERK/2 negative) and control   | 40 (17)   | ref                       |             |         |
| (low p-mTOR and pERK/2 negative) and tamoxifen | 117 (24)  | 0.25                      | 0.13-0.48   | <0.0001 |
| (high p-mTOR or pERK/2 positive) and control   | 54 (9)    | ref                       |             |         |
| (high p-mTOR or pERK/2 positive) and tamoxifen | 214 (52)  | 1.00                      | 0.48-2.08   | 1.00    |
| Interaction p-mTOR X treatment                 |           |                           |             | 0.004   |
| <sup>1</sup> stratified for nodal status       |           |                           |             |         |
| Analysis based on 425 cases with 102 events    |           |                           |             |         |

Table S17. Multivariate Cox proportional hazard model of recurrence free interval (RFI) including p-p70S6K in patients who did not receive tamoxifen

| Variable                                  | N(events) | Hazard Ratio | 95% CI       | p-value |
|-------------------------------------------|-----------|--------------|--------------|---------|
| <b>Age</b>                                |           |              |              |         |
| < 65                                      | 52 (16)   | ref          |              |         |
| ≥ 65                                      | 42 (9)    | 0.75         | 0.32-1.77    | 0.51    |
| <b>p T-stage</b>                          |           |              |              |         |
| T1 or T2                                  | 87 (20)   | ref          |              |         |
| T3 or T4                                  | 7 (5)     | 6.45         | 1.87 – 22.17 | 0.003   |
| <b>Histologic grade</b>                   |           |              |              |         |
| I-II                                      | 57 (14)   | ref          |              |         |
| III                                       | 37 (11)   | 0.76         | 0.33-1.76    | 0.53    |
| <b>Progesterone receptor</b>              |           |              |              |         |
| negative                                  | 45 (11)   | ref          |              |         |
| positive                                  | 49 (14)   | 1.31         | 0.55-3.18    | 0.54    |
| <b>Lymph node status</b>                  |           |              |              |         |
| negative                                  | 75 (13)   | ref          |              |         |
| positive                                  | 19 (12)   | 7.47         | 2.80– 19.90  | <0.001  |
| <b>p-p70S6K</b>                           |           |              |              |         |
| negative                                  | 40 (17)   | ref          |              |         |
| positive                                  | 54 (8)    | 0.11         | 0.04-0.32    | <0.001  |
| Analysis based on 94 cases with 25 events |           |              |              |         |

Table S18. Multivariate Cox proportional hazard model of recurrence free interval (RFI) including p-mTOR in patients who did not receive tamoxifen

| Variable                                  | N(events) | Hazard Ratio | 95% CI      | p-value |
|-------------------------------------------|-----------|--------------|-------------|---------|
| <b>Age</b>                                |           |              |             |         |
| < 65                                      | 50 (16)   | ref          |             |         |
| ≥ 65                                      | 44 (10)   | 0.52         | 0.21-1.27   | 0.15    |
| <b>p T-stage</b>                          |           |              |             |         |
| T1 or T2                                  | 85 (20)   | ref          |             |         |
| T3 or T4                                  | 9 (6)     | 5.79         | 1.88-17.82  | 0.002   |
| <b>Histologic grade</b>                   |           |              |             |         |
| I-II                                      | 57 (14)   | ref          |             |         |
| III                                       | 37 (12)   | 0.85         | 0.35-2.09   | 0.73    |
| <b>Progesterone receptor</b>              |           |              |             |         |
| negative                                  | 46 (11)   | ref          |             |         |
| positive                                  | 48 (15)   | 1.91         | 0.75-4.85   | 0.17    |
| <b>Lymph node status</b>                  |           |              |             |         |
| negative                                  | 74 (13)   | ref          |             |         |
| positive                                  | 20 (13)   | 4.47         | 1.90– 10.52 | 0.001   |
| <b>p-mTOR</b>                             |           |              |             |         |
| Low (0-59%)                               | 68 (24)   | ref          |             |         |
| High (≥ 60%)                              | 26 (2)    | 0.11         | 0.02-0.55   | 0.007   |
| Analysis based on 94 cases with 26 events |           |              |             |         |

Table S19. Multivariate Cox proportional hazard model of recurrence free interval (RFI) including p-AKT(Thr308) in patients who did not receive tamoxifen

| Variable                                   | N(events) | Hazard Ratio | 95% CI      | p-value |
|--------------------------------------------|-----------|--------------|-------------|---------|
| <b>Age</b>                                 |           |              |             |         |
| < 65                                       | 52 (16)   | ref          |             |         |
| ≥ 65                                       | 48 (10)   | 0.52         | 0.29-1.17   | 0.12    |
| <b>p T-stage</b>                           |           |              |             |         |
| T1 or T2                                   | 90 (20)   | ref          |             |         |
| T3 or T4                                   | 10 (6)    | 1.62         | 0.54 – 4.88 | 0.40    |
| <b>Histologic grade</b>                    |           |              |             |         |
| I-II                                       | 63 (14)   | ref          |             |         |
| III                                        | 37 (12)   | 1.17         | 0.49-2.76   | 0.73    |
| <b>Progesterone receptor</b>               |           |              |             |         |
| negative                                   | 51 (11)   | ref          |             |         |
| positive                                   | 49 (15)   | 1.18         | 0.50-2.80   | 0.71    |
| <b>Lymph node status</b>                   |           |              |             |         |
| negative                                   | 79 (13)   | ref          |             |         |
| positive                                   | 21 (13)   | 5.76         | 2.25– 14.75 | 0.0002  |
| <b>p-AKT (Thr308)</b>                      |           |              |             |         |
| negative                                   | 61 (20)   | ref          |             |         |
| positive                                   | 39 (6)    | 0.30         | 0.12-0.80   | 0.02    |
| Analysis based on 100 cases with 26 events |           |              |             |         |

Table S20. Multivariate Cox proportional hazard model of recurrence free interval (RFI) including p-AKT(Ser473) in patients who did not receive tamoxifen

| Variable                                  | N(events) | Hazard Ratio | 95% CI     | p-value |
|-------------------------------------------|-----------|--------------|------------|---------|
| <b>Age</b>                                |           |              |            |         |
| < 65                                      | 44 (14)   | ref          |            |         |
| ≥ 65                                      | 43 (10)   | 0.55         | 0.23-1.32  | 0.19    |
| <b>p T-stage</b>                          |           |              |            |         |
| T1 or T2                                  | 79 (20)   | ref          |            |         |
| T3 or T4                                  | 8 (4)     | 8.98         | 2.17-37.10 | 0.002   |
| <b>Histologic grade</b>                   |           |              |            |         |
| I-II                                      | 44 (14)   | ref          |            |         |
| III                                       | 43 (10)   | 0.45         | 0.47-1.12  | 0.11    |
| <b>Progesterone receptor</b>              |           |              |            |         |
| negative                                  | 44 (11)   | ref          |            |         |
| positive                                  | 43 (13)   | 1.51         | 0.61-3.71  | 0.37    |
| <b>Lymph node status</b>                  |           |              |            |         |
| negative                                  | 67 (21)   | ref          |            |         |
| positive                                  | 20 (12)   | 7.23         | 2.88-18.12 | <0.001  |
| <b>p-AKT (Ser473)</b>                     |           |              |            |         |
| negative                                  | 41 (14)   | ref          |            |         |
| positive                                  | 46 (10)   | 0.30         | 0.12-0.76  | 0.01    |
| Analysis based on 87 cases with 24 events |           |              |            |         |

Figure S1 phospho-specificity of the antibodies

For each antibody a test TMA containing positive cores was dephosphorylated by  $\lambda$ -phosphatase before staining, resulting in no detection of the phospho-protein.

- A. p-AKT(Ser473) without  $\lambda$ -phosphatase (left panel) and after  $\lambda$ -phosphatase (right panel)
- B. p-AKT(Thr 308) without  $\lambda$ -phosphatase (left panel) and after  $\lambda$ -phosphatase (right panel)
- C. p-mTOR(Ser2448) without  $\lambda$ -phosphatase (left panel) and after  $\lambda$ -phosphatase (right panel)
- D. p-ERK1/2 (Thr202/Tyr204) without  $\lambda$ -phosphatase (left panel) and after  $\lambda$ -phosphatase (right panel)
- E. p-p70S6K(Thr389) without  $\lambda$ -phosphatase (left panel) and after  $\lambda$ -phosphatase (right panel)

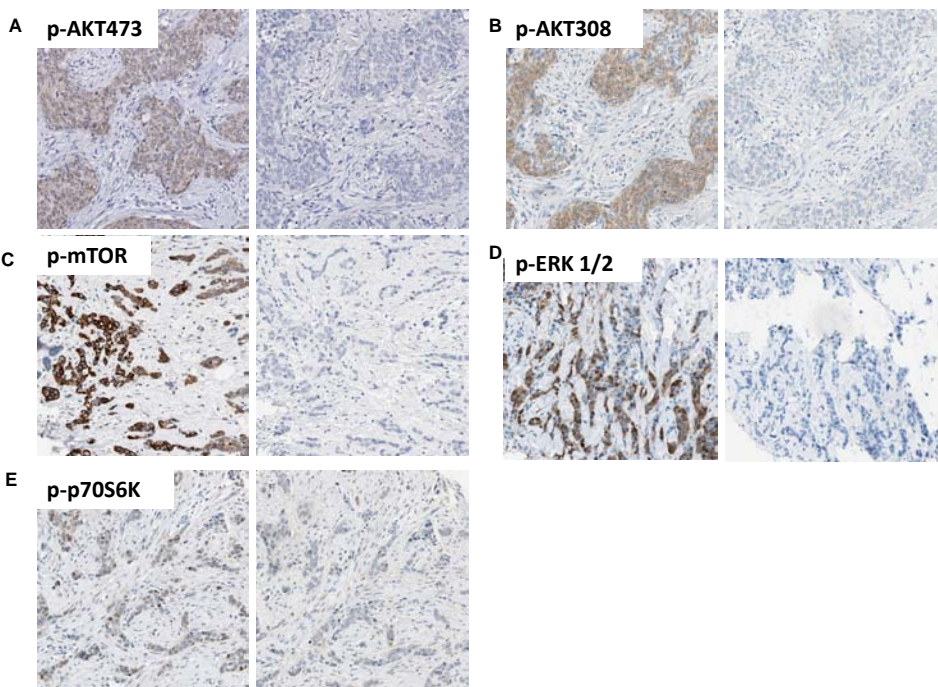

Figure S2 Data flow

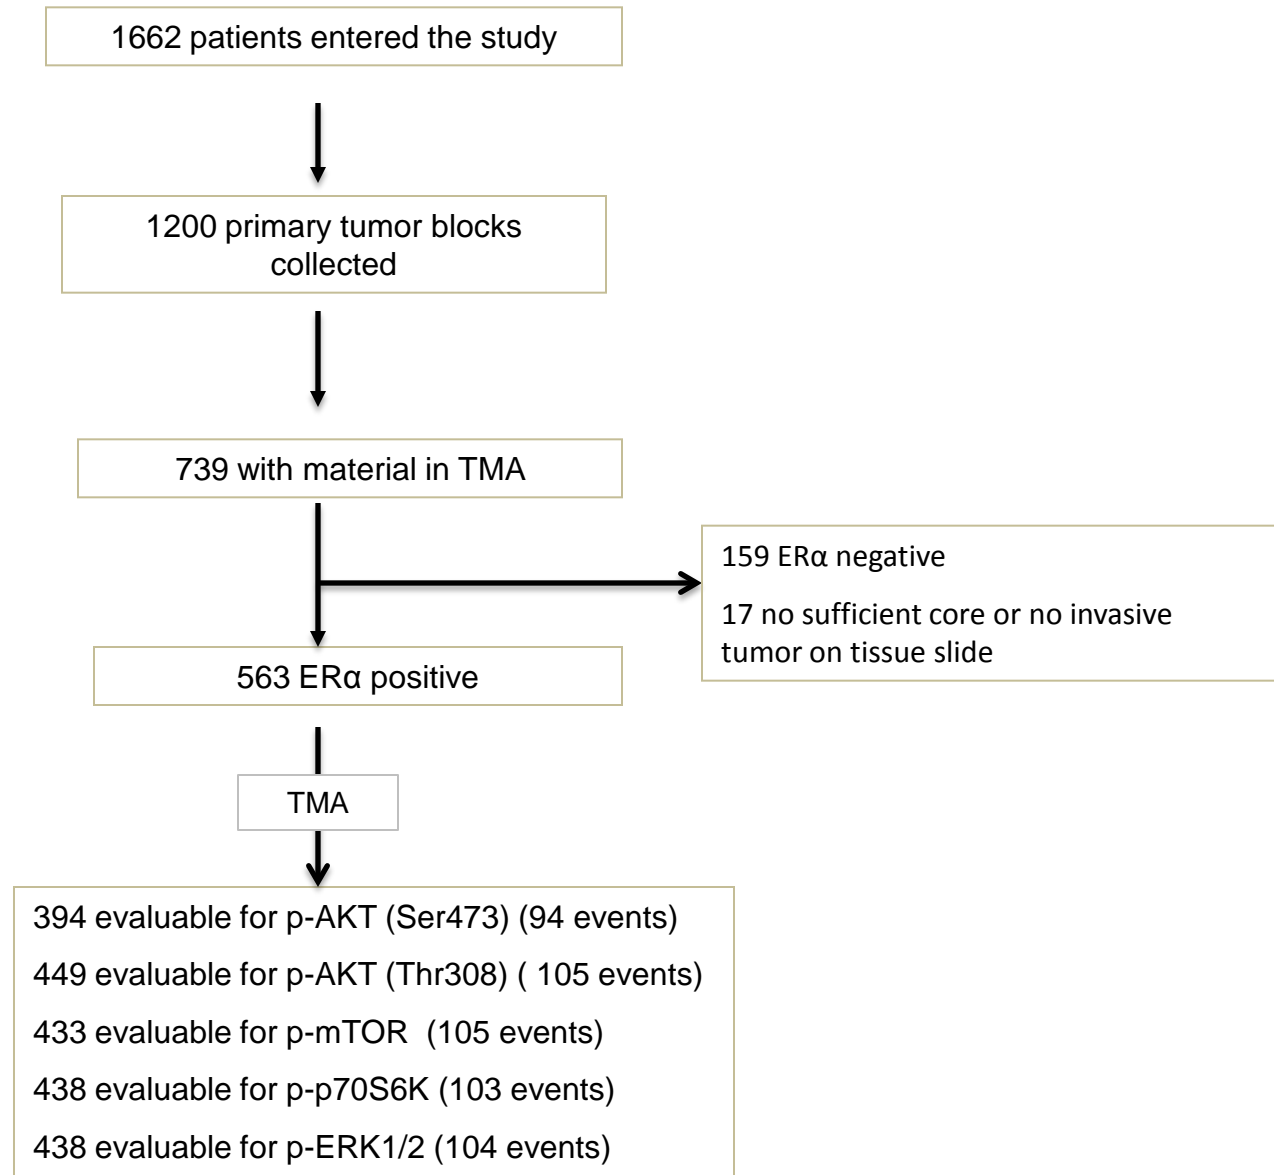



Figure S3a: Expression of p-AKT (ser473) according to relative age of tumor samples (divided in quartiles)

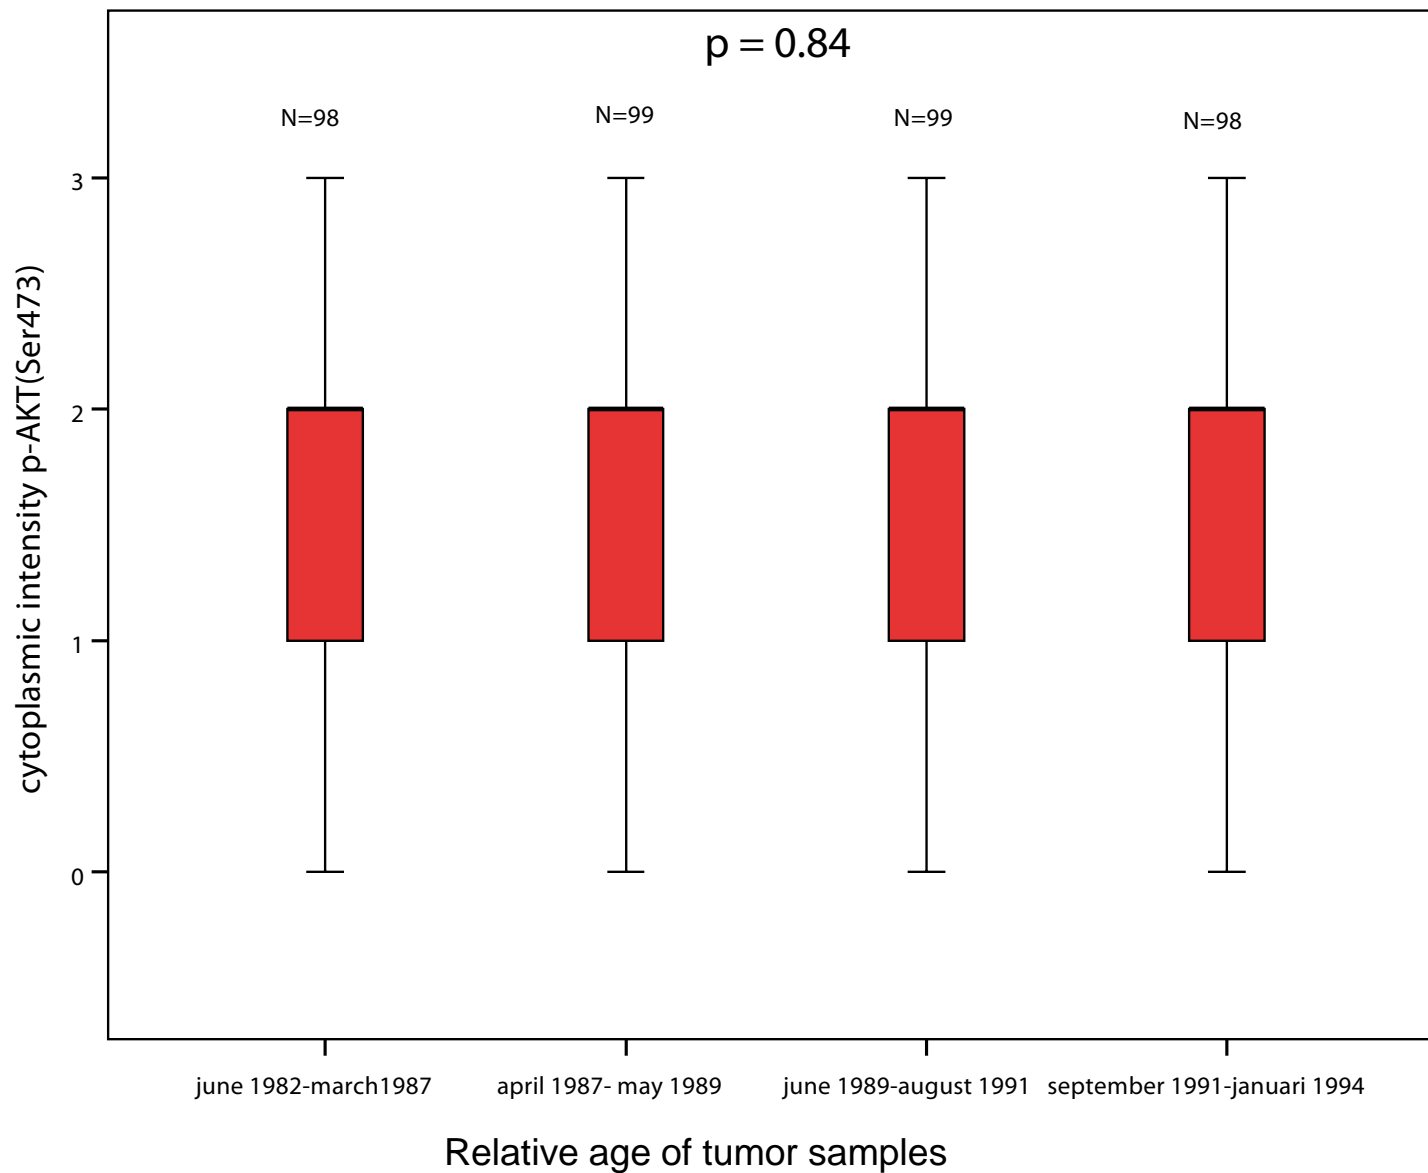

Figure S3b: Expression of p-AKT (Thr308) according to relative age of tumor samples (divided in quartiles)

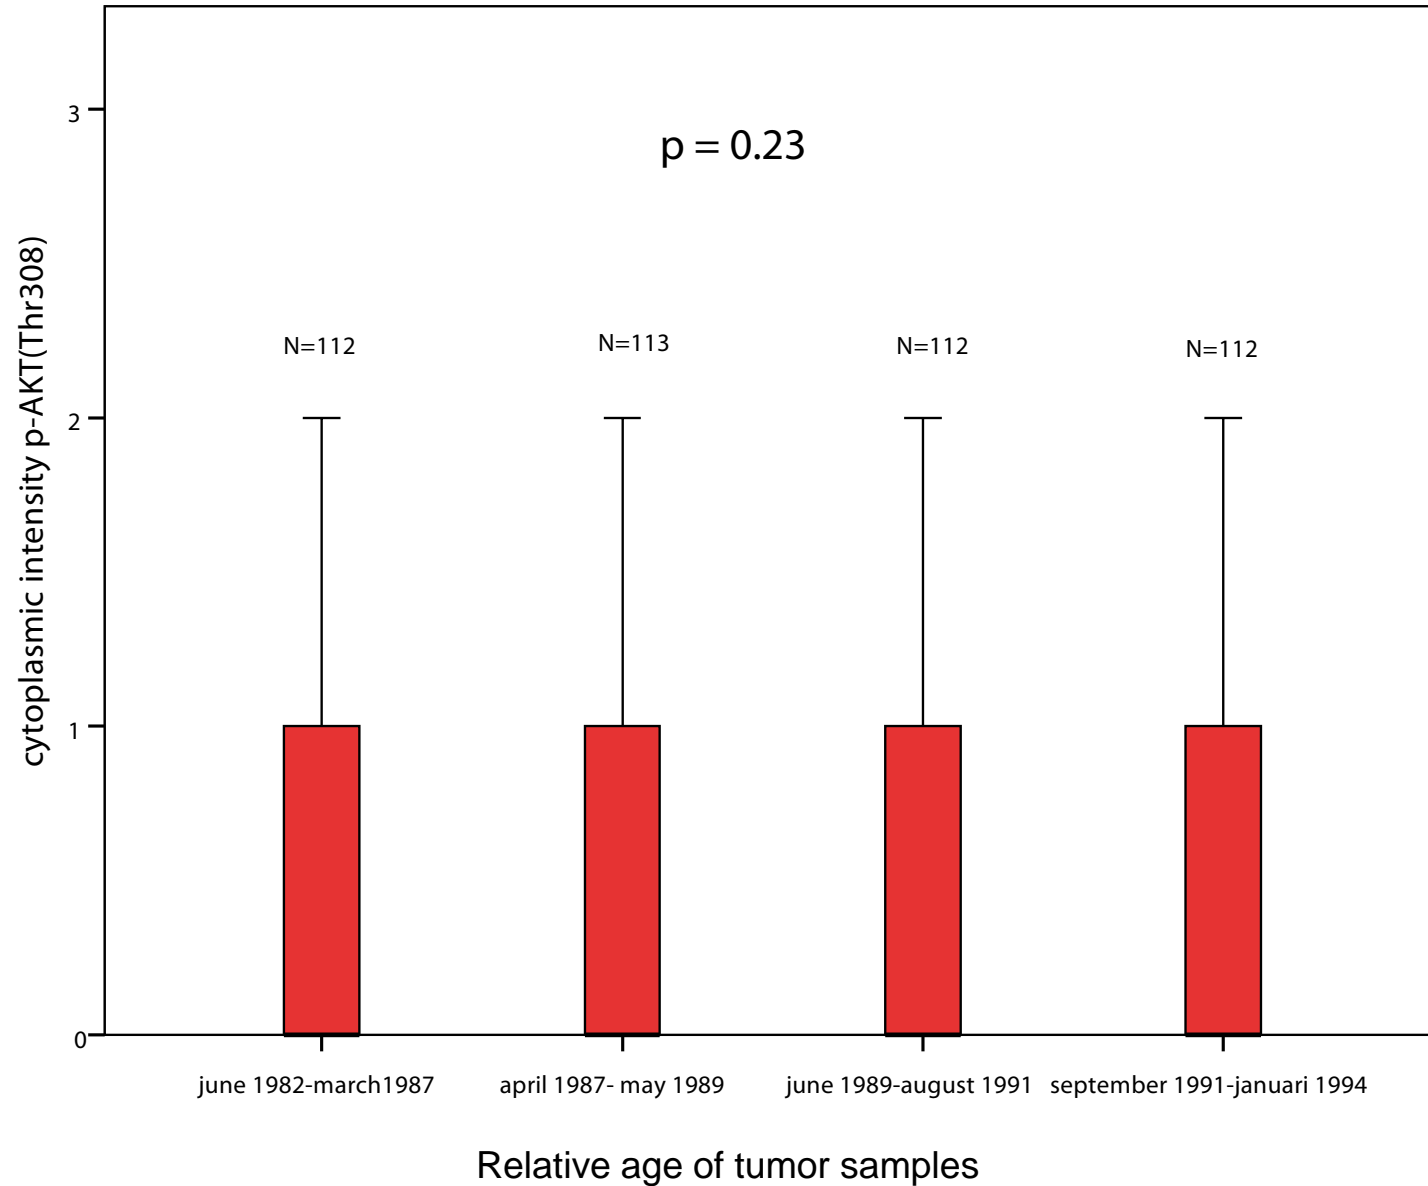

Figure S3c Expression of p-mTOR according to relative age of tumor samples (divided in quartiles)

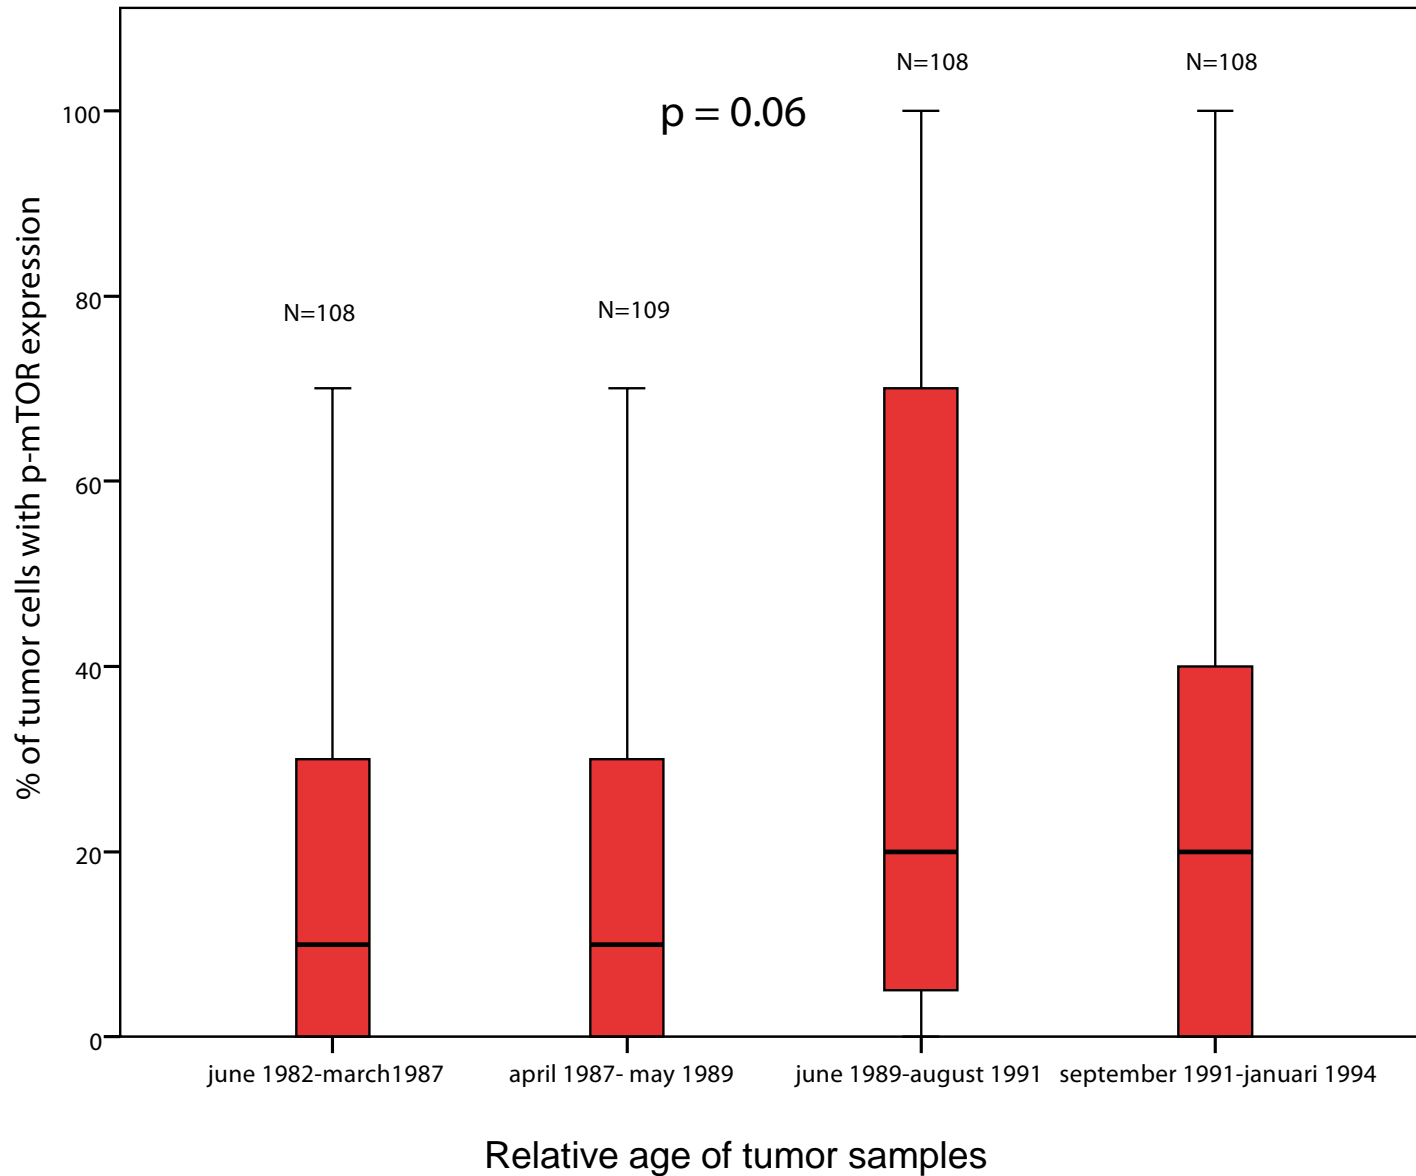

Figure S3d Expression of p-ERK1/2 according to relative age of tumor samples (divided in quartiles)

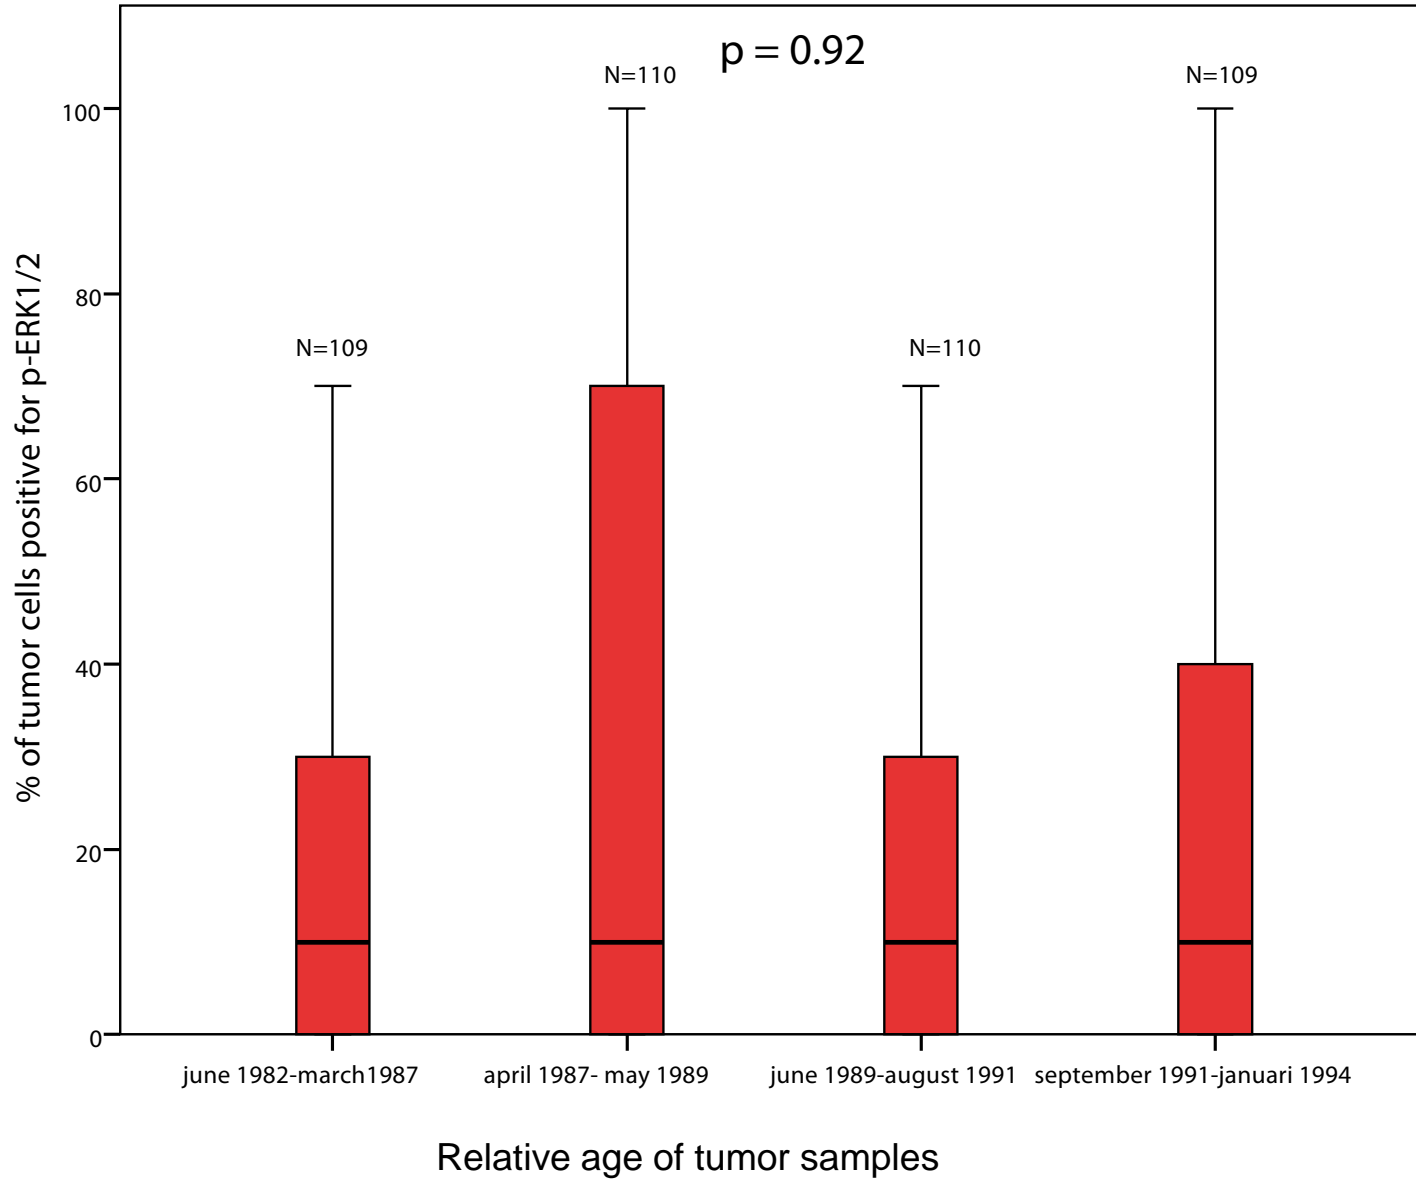

Figure S3e Expression of p-p70S6K according to relative age of tumor samples (divided in quartiles)

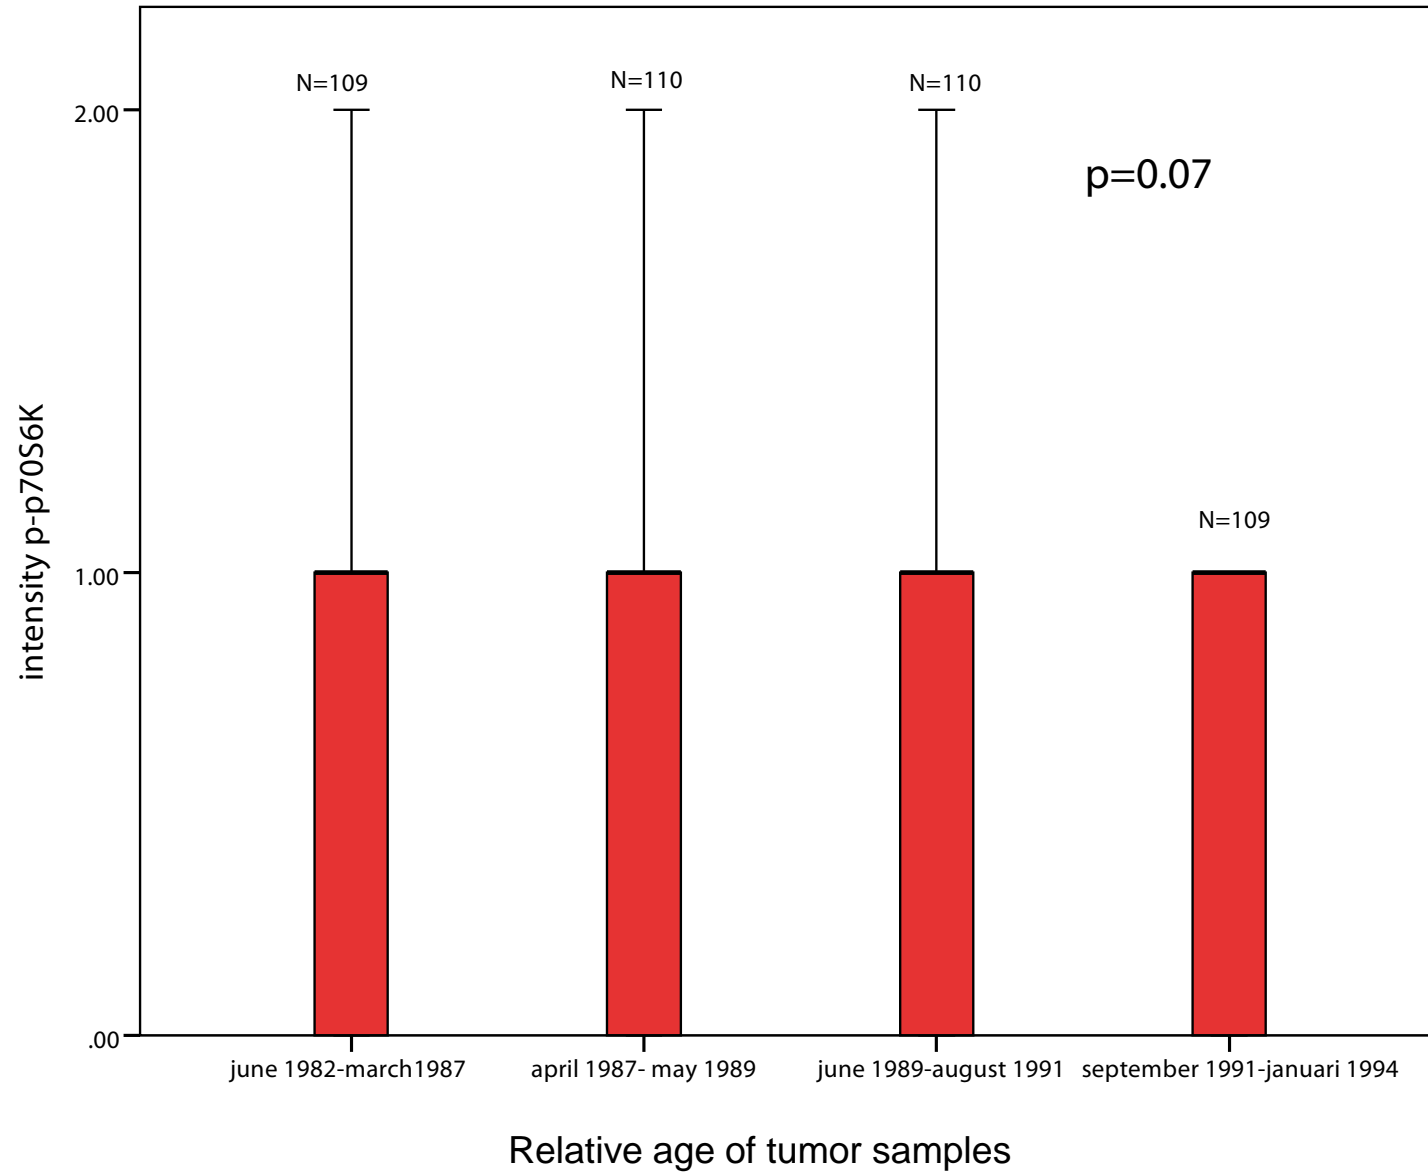

Figure S4a Expression of p-AKT (Ser473) according to institute\*

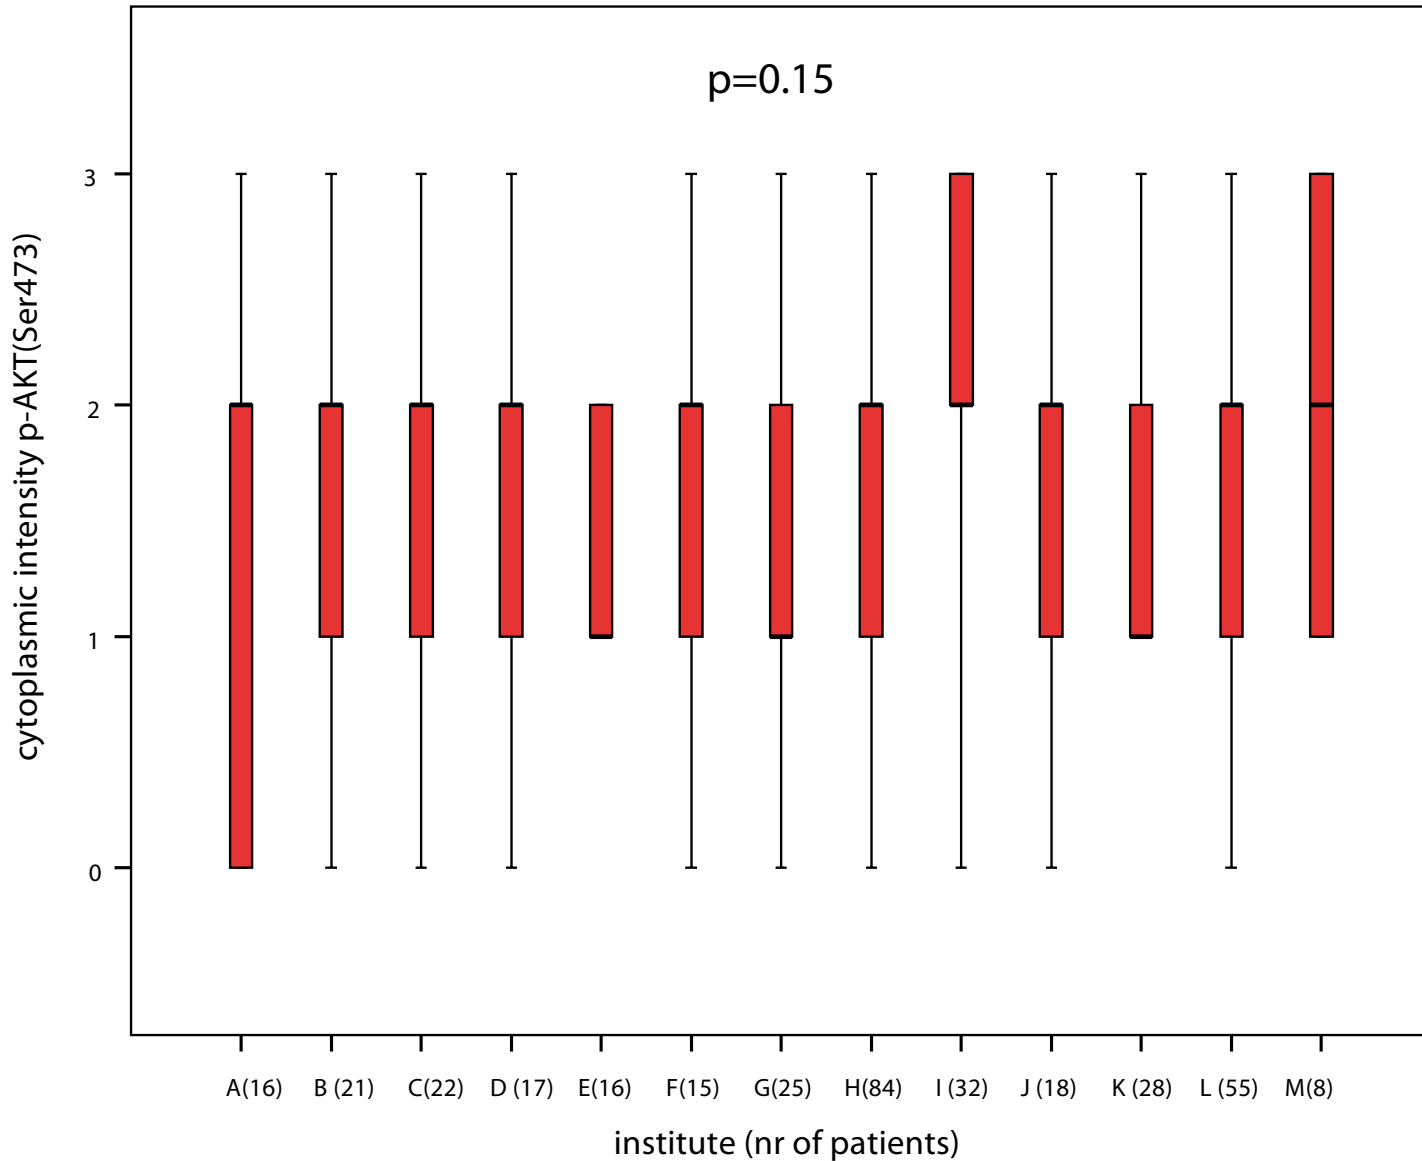

\*institutes including  $\geq 10$  patients with sufficient data for analysis of at least one phospho-protein are shown

Figure S4b Expression of p-AKT (Thr308) according to institute\*

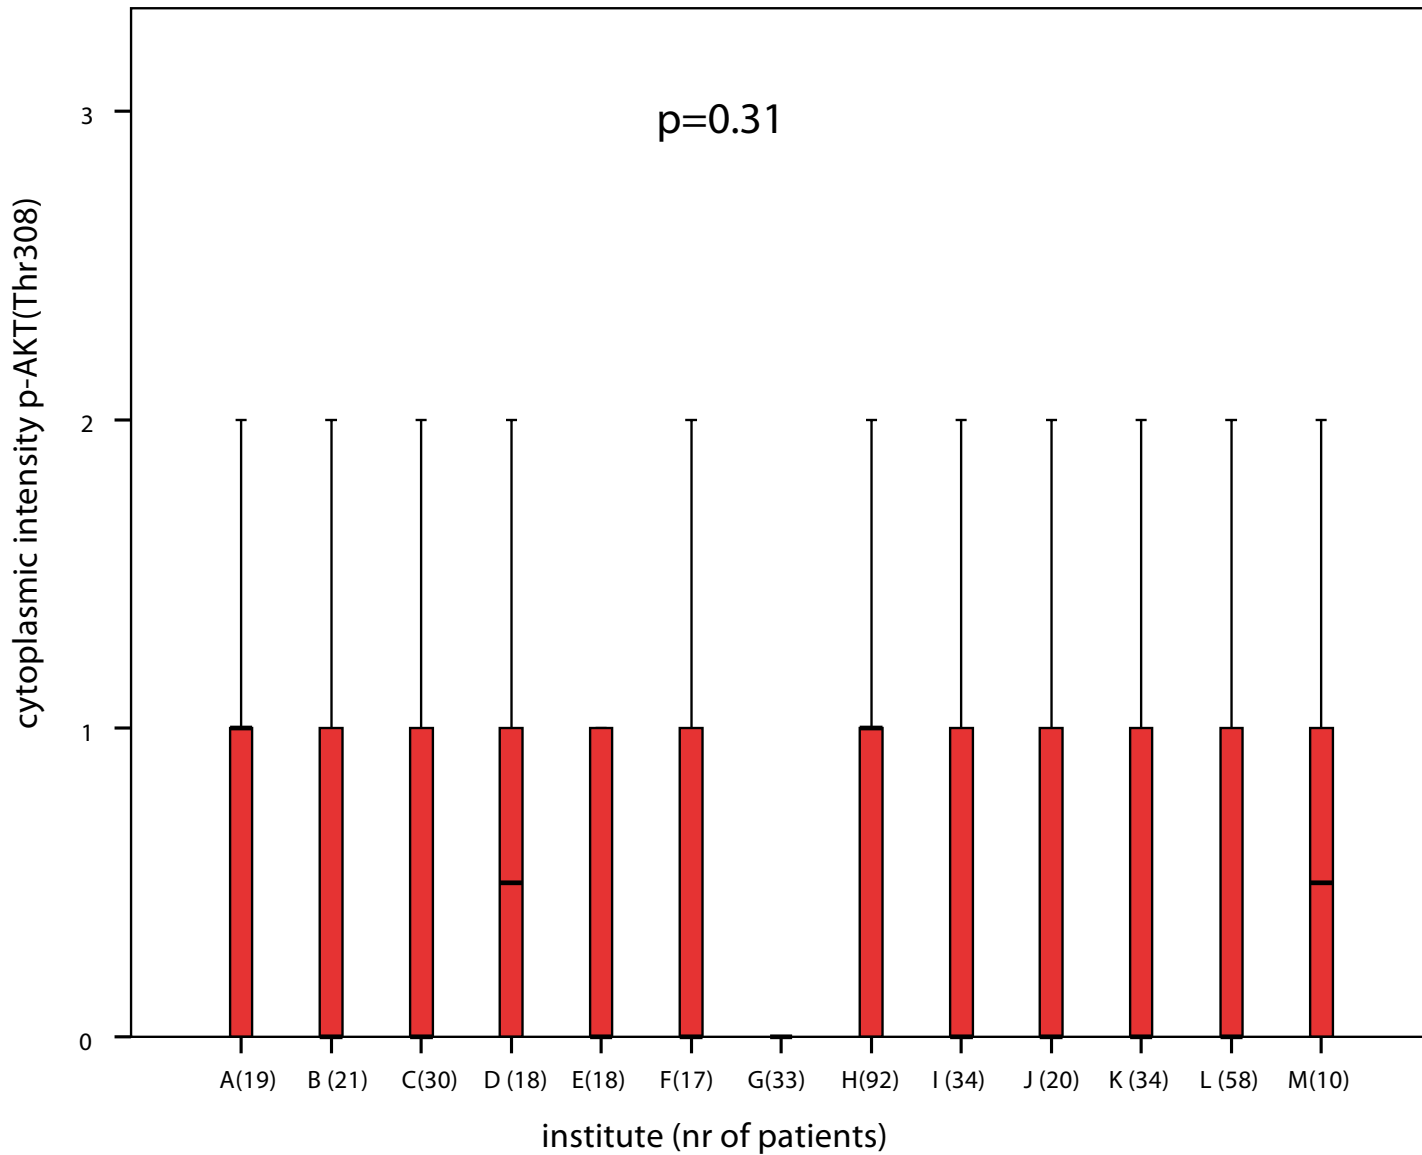

\*institutes including  $\geq 10$  patients with sufficient data for analysis of at least one phospho-protein are shown

Figure S4c Expression of p-mTOR according to institute\*

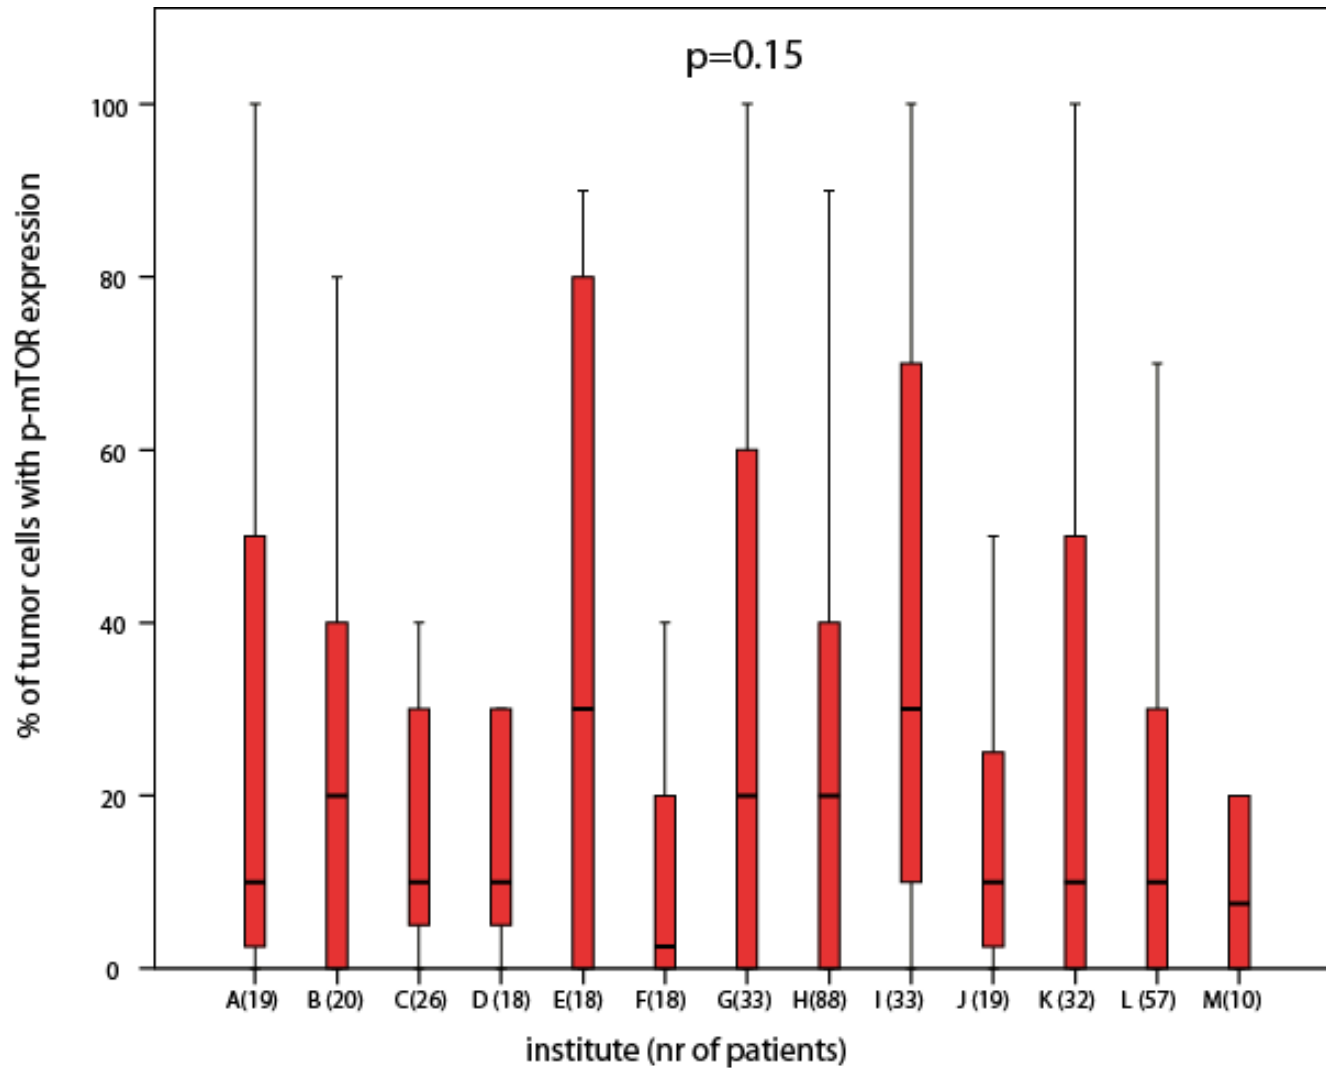

\*institutes including  $\geq 10$  patients with sufficient data for analysis of at least one phospho-protein are shown



Figure S4d Expression of p-ERK1/2 according to institute\*

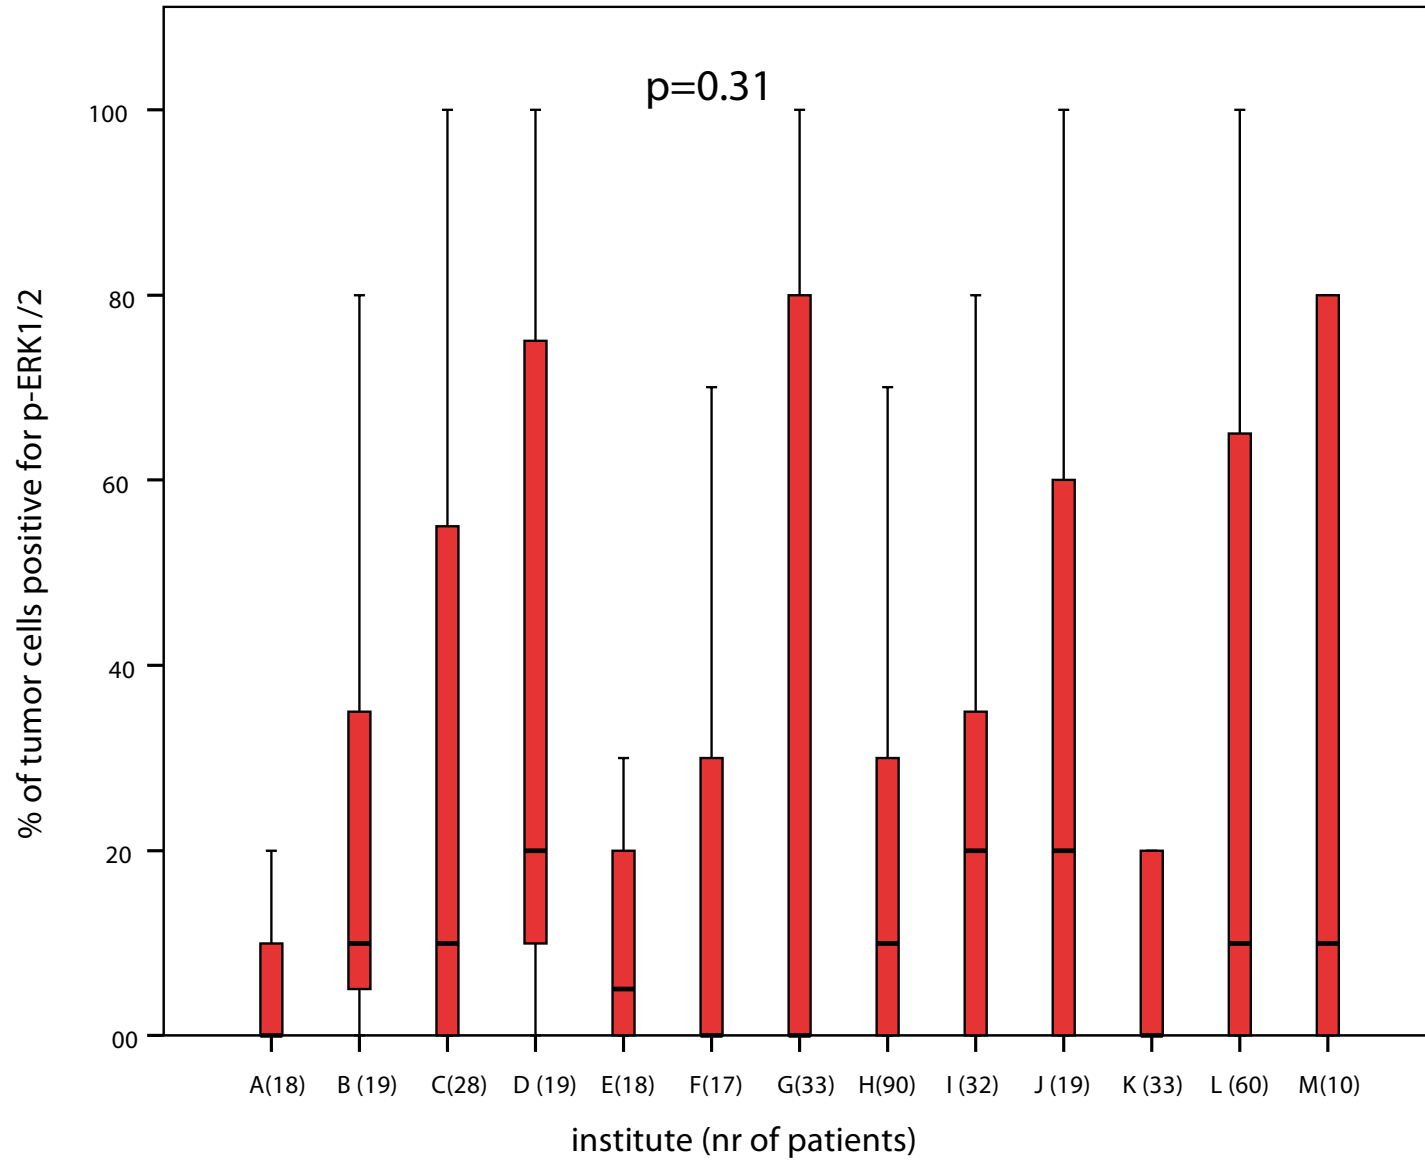

\*institutes including  $\geq 10$  patients with sufficient data for analysis of at least one phospho-protein are shown

Figure S4e Expression of p-p70S6K according to institute\*

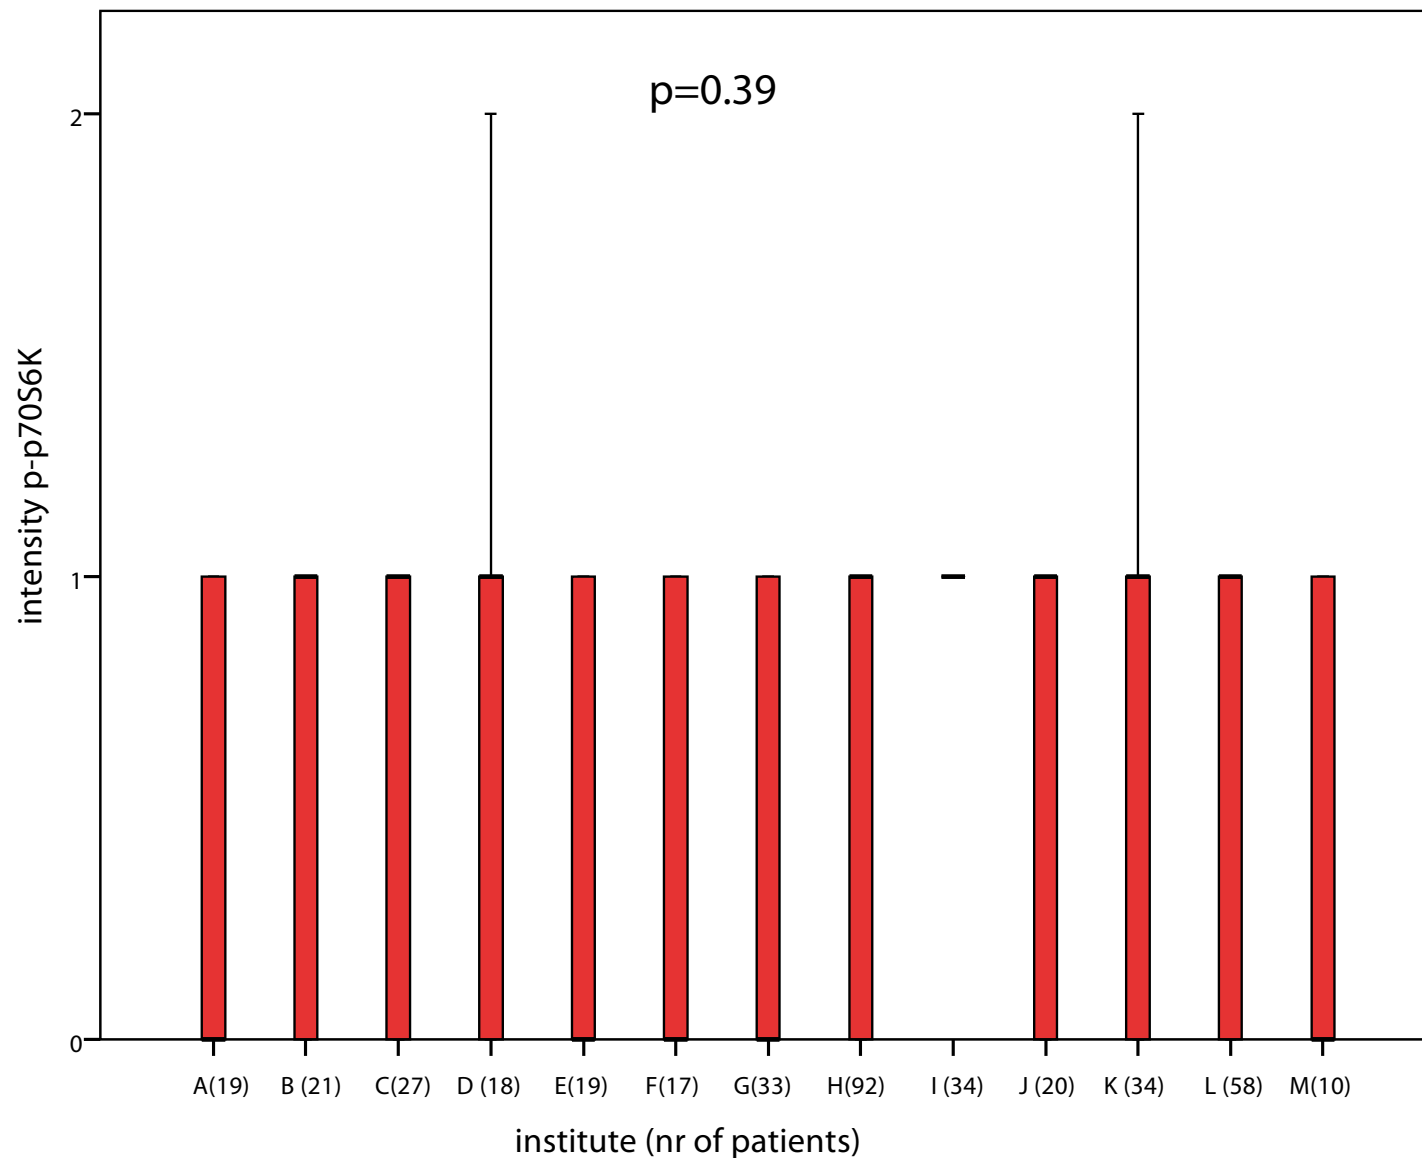

\*institutes including  $\geq 10$  patients with sufficient data for analysis of at least one phospho-protein are shown

Figure S4F Expression of PgR according to institute\*

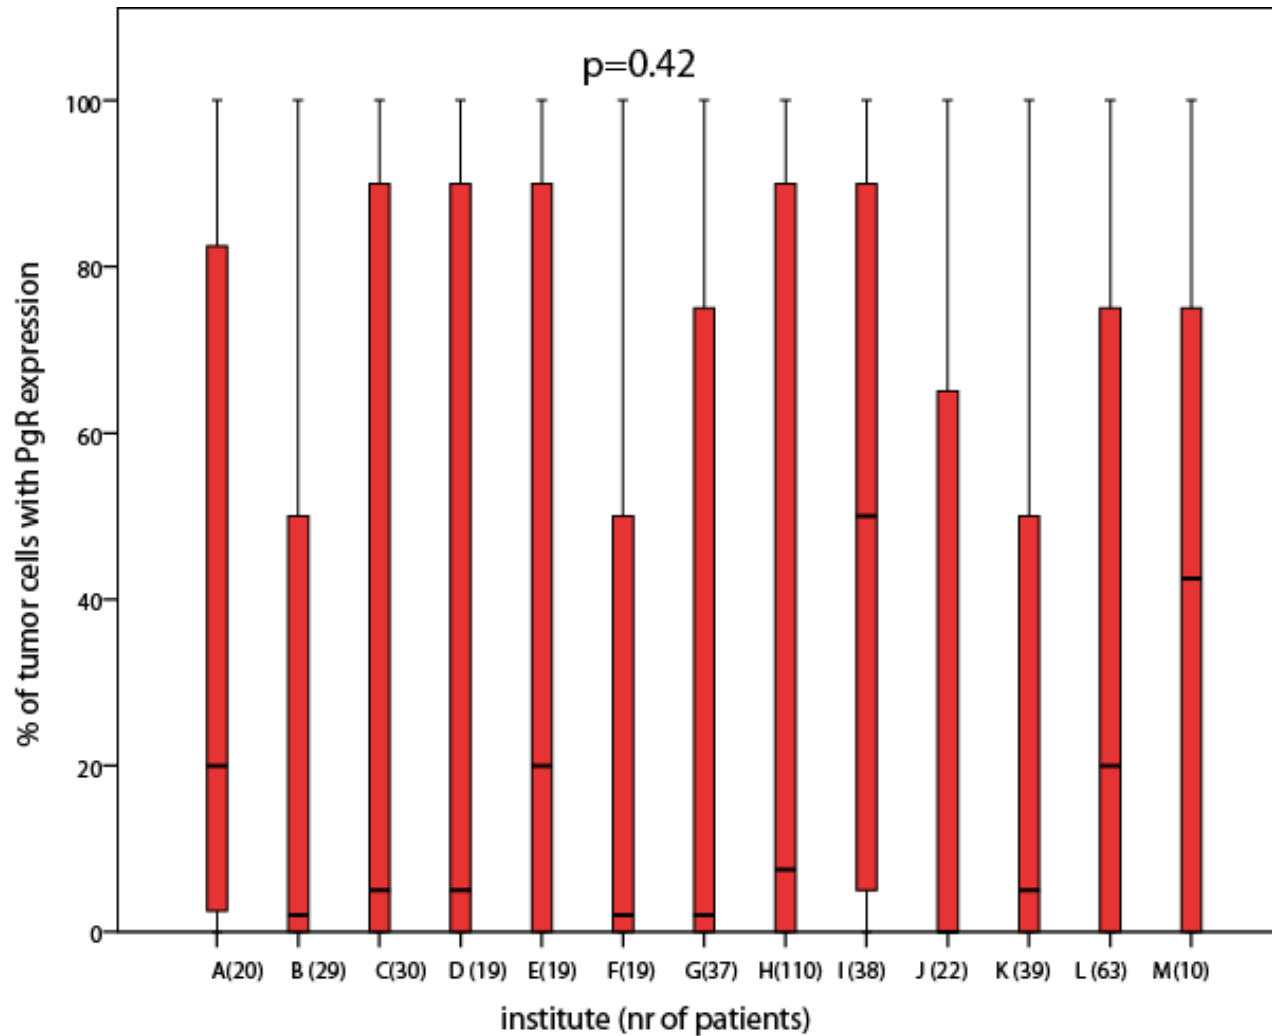

\*institutes including  $\geq 10$  patients with sufficient data for analysis of at least one phospho-protein are shown

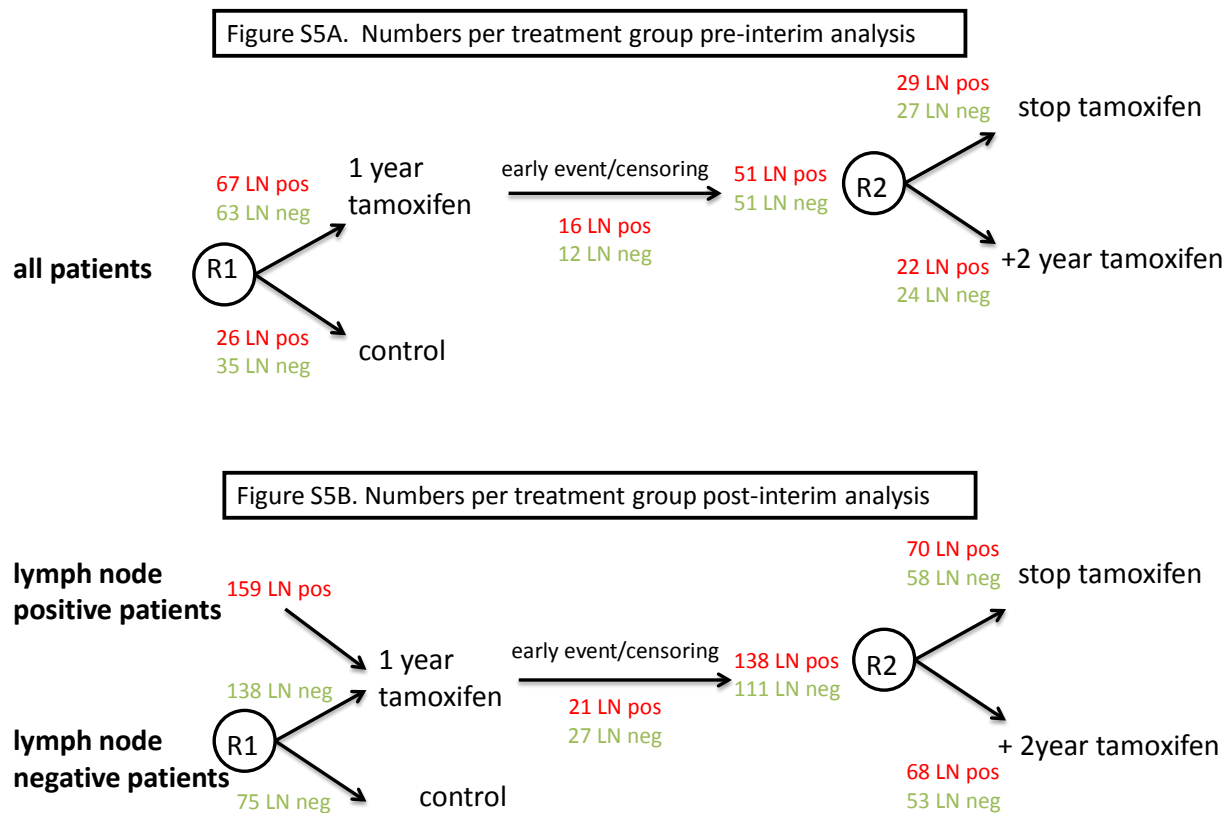

Figure S5

Numbers of patients per randomization group pre-interim analysis (A) and post-interim analysis (B), for the total subset of 563 ER $\alpha$  positive patients. From 1989, based on two interim analyses showing a significant improvement in recurrence-free survival among lymph node positive patients, these node positive patients were all allocated to the tamoxifen treatment arm (i.e. skipped the first randomization). Numbers of lymph node negative patients are depicted in green. In red are depicted the numbers of lymph node positive patients. Abbreviations: LN neg: lymph node negative, LN pos: lymph node positive, R1: randomization 1, R2: randomization 2.

**Figure S6:** Kaplan Meier survival analysis according to tamoxifen treatment in patients whose tumors express low levels of p-mTOR (A) and patients whose tumors express high p-mTOR (B).

Patients with tumours with low p-mTOR

Patients with tumours with high p-mTOR

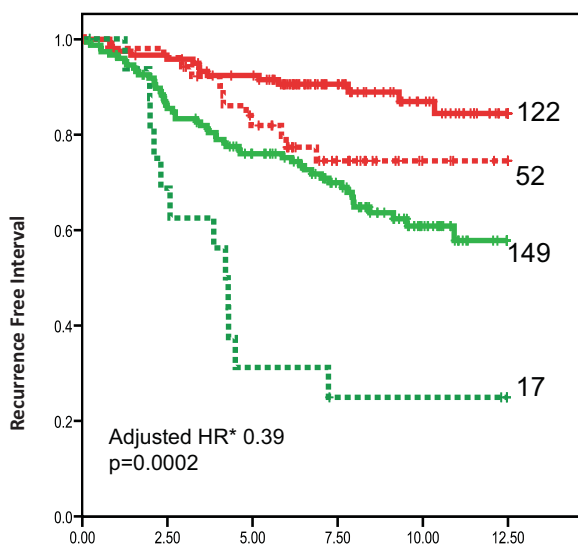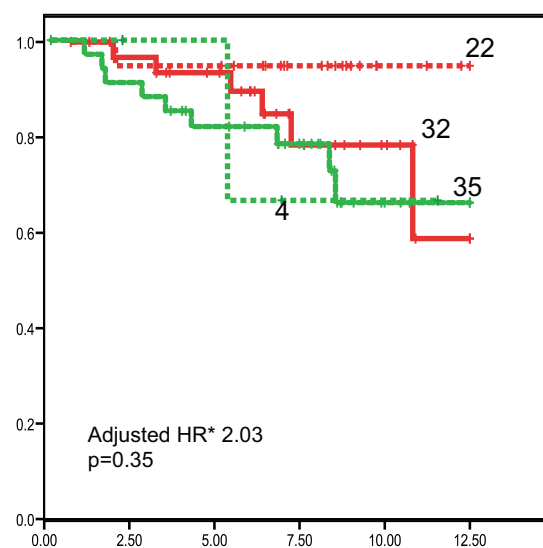

therapy

- adjuvant tamoxifen (node negative)
- - -■- control (node negative)
- adjuvant tamoxifen (node positive)
- - -■- control (node positive)

No. at risk

|       |     |     |     |     |      |      |
|-------|-----|-----|-----|-----|------|------|
|       | 0   | 2.5 | 5.0 | 7.5 | 10.0 | 12.5 |
| TAM   | 271 | 235 | 204 | 133 | 69   | 28   |
| Contr | 69  | 61  | 44  | 24  | 11   | 7    |

No. at risk

|       |    |     |     |     |      |      |
|-------|----|-----|-----|-----|------|------|
|       | 0  | 2.5 | 5.0 | 7.5 | 10.0 | 12.5 |
| TAM   | 67 | 61  | 50  | 30  | 12   | 4    |
| Contr | 26 | 22  | 22  | 13  | 4    | 2    |

\* HR stratified for nodal status

**Figure S7:** Kaplan Meier survival analysis according to tamoxifen treatment in patients whose tumors do not express p-AKT(Thr308) (A) and patients whose tumors do express p-AKT(Thr308)(B)

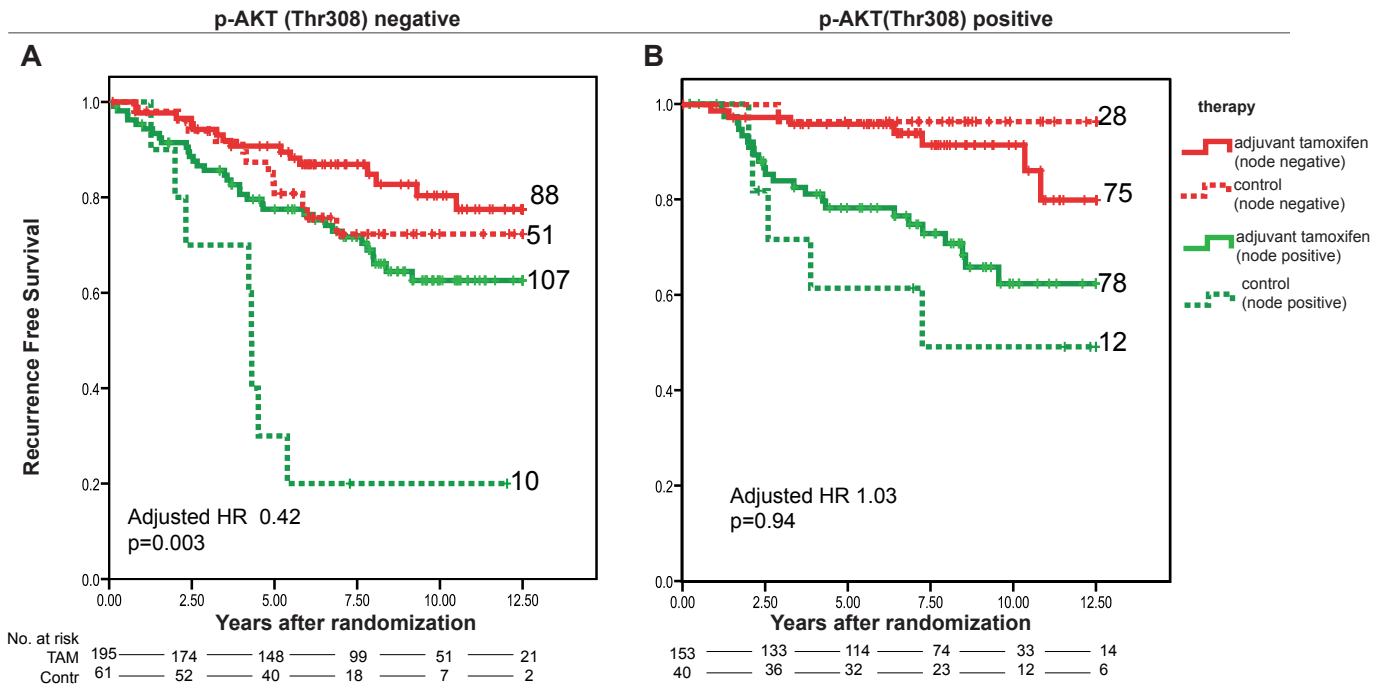

**Figure S8:** Kaplan Meier survival analysis according to tamoxifen treatment in patients whose tumors do not express p-ERK1/2 (A) and patients whose tumors do express p-ERK1/2 (B)

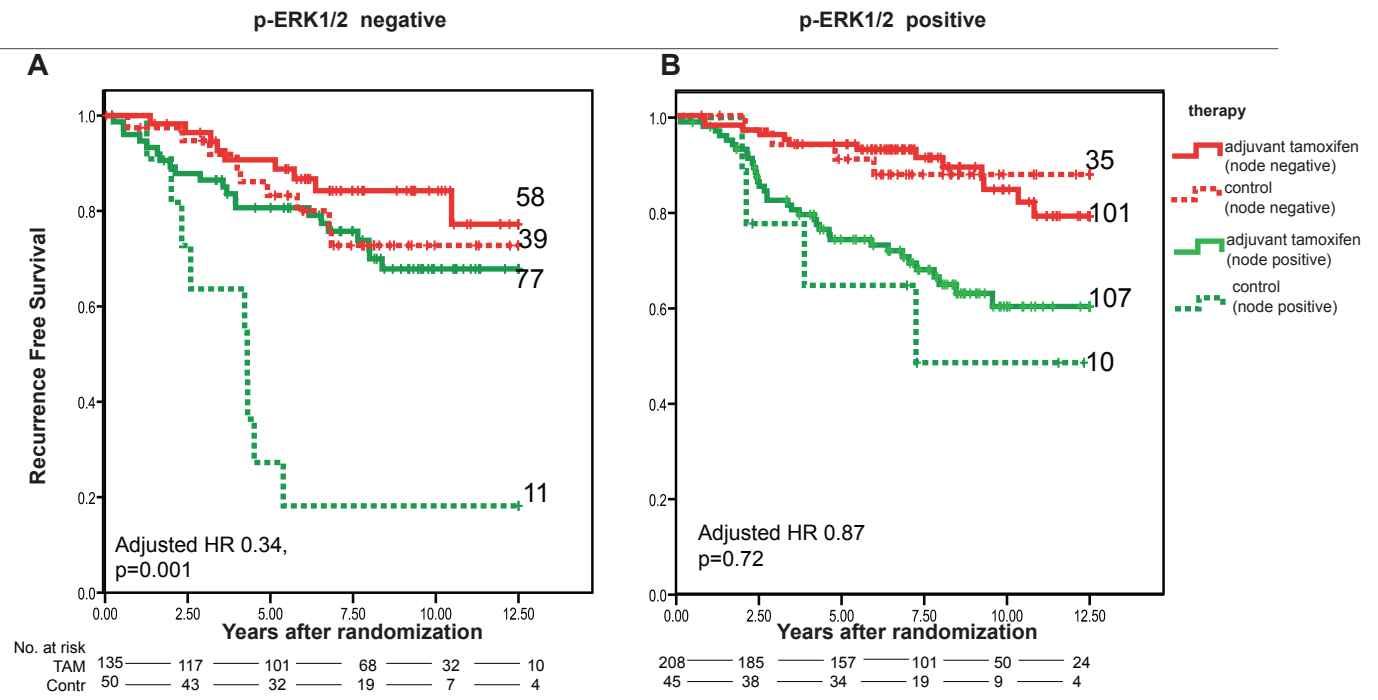

Supplement: bcr3598-S1.pdf [file bcr3598-S1.pdf]
